# Supplementary material
Source: PubMed Central journal article supplement (PMC3537505)
Supplement: NIHMS420064-supplement-1_si_001.pdf [file NIHMS420064-supplement-1_si_001.pdf]

## Supporting Information for

### The reaction mechanism of the enantioselective Tsuji allylation: inner-sphere and outer-sphere pathways, internal rearrangements, and asymmetric C–C bond formation

John A. Keith,<sup>1</sup> Douglas C. Behenna,<sup>2</sup> Nathaniel Sherden,<sup>2</sup> Justin T. Mohr,<sup>2</sup> Sandy Ma,<sup>2</sup> Smaranda C. Marinescu,<sup>2</sup> Robert J. Nielsen,<sup>1</sup> Jonas Oxgaard,<sup>1</sup> Brian M. Stoltz,<sup>2,\*</sup> and William A. Goddard, III<sup>1,\*</sup>

<sup>1</sup>Materials and Process Simulation Center, Beckman Institute, California Institute of Technology, Pasadena, California 91125, United States

<sup>2</sup>The Warren and Katharine Schlinger Laboratory for Chemistry and Chemical Engineering, Division of Chemistry and Chemical Engineering, California Institute of Technology, Pasadena, California 91125, United States

Cartesian coordinates for species mentioned in the text are below. Total calculated energies (in kcal/mol) are reported with each structure as the following:

A : B3LYP/BS3//B3LYP/BS2 electronic energies + Solvation

B : mPW1PW91/BS3//B3LYP/BS2 electronic energies + Solvation

C : B3LYP/BS3//B3LYP/BS2 electronic energies + Solvation + Dispersion

Where BS2 is the LACVP electronic core potential on Pd with the 6-31G\*\* basis set on all other atoms, and BS3 is the LACV3P electronic core potential on Pd with the 6-311++G\*\* basis set on all other atoms. See the main text for calculation details.

1:

|   | A            | B            | C            |
|---|--------------|--------------|--------------|
|   | -410669.0747 | -410562.7627 | -410685.4002 |
| C | 0.03078      | -0.05642     | -0.01536     |
| C | 0.01294      | -0.03866     | 1.31673      |
| C | 1.24357      | -0.01563     | 2.16656      |
| O | 1.14642      | -1.10467     | 3.12130      |
| C | 2.11534      | -1.11219     | 4.06045      |
| O | 3.00961      | -0.30816     | 4.15004      |
| O | 1.99675      | -2.14964     | 4.91415      |
| C | 0.89453      | -3.03270     | 4.85713      |
| C | 1.07029      | -4.27197     | 4.38326      |
| H | -0.88509     | -0.02621     | -0.59724     |
| H | 0.96237      | -0.09370     | -0.57414     |
| H | -0.93386     | -0.00515     | 1.85313      |
| H | 2.15309      | -0.13820     | 1.57123      |
| H | 1.33461      | 0.92173      | 2.72655      |
| C | -1.56759     | -3.39731     | 5.21404      |
| C | -0.35875     | -2.48943     | 5.48793      |
| C | -0.06353     | -5.27696     | 4.44820      |
| C | -1.19054     | -4.87044     | 5.40920      |
| H | -1.90696     | -3.24401     | 4.18127      |
| H | -2.40090     | -3.11636     | 5.86746      |
| H | -0.19474     | -2.37956     | 6.57004      |
| H | -0.54594     | -1.47990     | 5.10393      |
| H | -0.46745     | -5.42157     | 3.43438      |
| H | 0.34447      | -6.25420     | 4.74041      |
| H | -0.85733     | -5.02313     | 6.44407      |
| H | -2.06194     | -5.51773     | 5.25976      |

|   |         |          |         |
|---|---------|----------|---------|
| C | 2.35534 | -4.74509 | 3.75878 |
| H | 2.74798 | -5.61794 | 4.29622 |
| H | 2.18480 | -5.06601 | 2.72245 |
| H | 3.12490 | -3.97214 | 3.75881 |

**CO2 (no solvation energies)**

|   | A            | B            | C            |
|---|--------------|--------------|--------------|
|   | -118383.2468 | -118348.7324 | -118383.3659 |
| C | -0.87534     | 0.68708      | 3.64034      |
| O | 0.03277      | 1.41941      | 3.55722      |
| O | -1.78345     | -0.04525     | 3.72345      |

**(S)-2**

|   | A            | B            | C           |
|---|--------------|--------------|-------------|
|   | -292320.6987 | -292247.2272 | -292337.914 |
| C | -0.00571     | -0.00795     | -0.00212    |
| C | 0.00003      | 0.00139      | 1.33248     |
| C | 1.23678      | -0.00360     | 2.18948     |
| C | 1.42537      | -1.27088     | 3.07061     |
| C | 2.71542      | -1.09894     | 3.90221     |
| O | 3.52749      | -0.22434     | 3.66015     |
| C | 0.21865      | -1.46615     | 4.03415     |
| C | 0.44540      | -2.51288     | 5.13605     |
| C | 1.70054      | -2.19342     | 5.95673     |
| C | 2.93797      | -2.08385     | 5.04534     |
| H | -0.00317     | -0.50064     | 4.51094     |
| H | -0.66731     | -1.73123     | 3.44550     |
| H | 0.53942      | -3.51412     | 4.69593     |
| H | -0.43451     | -2.54787     | 5.78909     |
| H | 1.55845      | -1.24166     | 6.48633     |
| H | 1.87099      | -2.95568     | 6.72537     |
| H | 3.82826      | -1.76143     | 5.59171     |
| H | 3.15527      | -3.07077     | 4.61346     |
| C | 1.60914      | -2.51195     | 2.16303     |
| H | 2.49422      | -2.39901     | 1.52804     |
| H | 1.72164      | -3.43690     | 2.73455     |
| H | 0.74041      | -2.62170     | 1.50698     |
| H | 1.21982      | 0.86849      | 2.85688     |
| H | -0.95673     | 0.03407      | 1.85447     |
| H | 0.91776      | -0.02841     | -0.57631    |
| H | -0.93137     | 0.01375      | -0.57039    |
| H | 2.12528      | 0.11683      | 1.56259     |

**Exo-3**

|    | A            | B            | C           |
|----|--------------|--------------|-------------|
|    | -1056412.849 | -1056242.798 | -1056470.07 |
| Pd | 0.00437      | -0.03175     | -0.00796    |
| C  | 0.01396      | -0.08763     | 2.22608     |
| C  | 1.32879      | -0.07374     | 1.67686     |
| C  | -0.87208     | -1.09850     | 1.86490     |
| N  | -1.49938     | -0.28143     | -1.53220    |
| P  | 1.39385      | 0.88492      | -1.63958    |
| H  | 1.96946      | 0.78439      | 1.85376     |
| H  | -1.92319     | -1.02449     | 2.12221     |
| H  | 1.85570      | -1.01447     | 1.52595     |
| H  | -0.50895     | -2.08406     | 1.58175     |
| H  | -0.37386     | 0.81232      | 2.69933     |
| C  | -2.96681     | -0.28477     | -1.25953    |
| C  | -3.50651     | -1.05537     | -2.48358    |

|   |          |          |          |
|---|----------|----------|----------|
| O | -2.41984 | -0.98504 | -3.44273 |
| C | -1.31512 | -0.61857 | -2.76976 |
| H | -4.38401 | -0.61432 | -2.95410 |
| C | 0.43099  | 5.33277  | -2.50101 |
| C | 0.47936  | 4.85098  | -1.19108 |
| C | 0.74331  | 3.50335  | -0.95277 |
| C | 0.97564  | 2.62556  | -2.02533 |
| C | 0.92545  | 3.11617  | -3.33900 |
| C | 0.65008  | 4.46466  | -3.57139 |
| H | 0.22084  | 6.38193  | -2.68647 |
| H | 0.30819  | 5.52312  | -0.35548 |
| H | 0.77486  | 3.13260  | 0.06830  |
| H | 1.10385  | 2.45442  | -4.18046 |
| H | 0.61118  | 4.83648  | -4.59102 |
| C | 5.95802  | 0.73973  | -0.84920 |
| C | 5.36474  | 1.94748  | -1.21390 |
| C | 3.99233  | 2.01092  | -1.46475 |
| C | 3.20255  | 0.85859  | -1.34370 |
| C | 3.80539  | -0.35434 | -0.96736 |
| C | 5.17630  | -0.41276 | -0.72919 |
| H | 7.02592  | 0.69413  | -0.65738 |
| H | 5.96859  | 2.84517  | -1.30828 |
| H | 3.54396  | 2.95560  | -1.75359 |
| H | 3.20482  | -1.25536 | -0.86913 |
| H | 5.63517  | -1.35562 | -0.44651 |
| C | 0.93743  | -1.44543 | -5.65669 |
| C | 2.14247  | -0.84885 | -5.30001 |
| C | 2.24555  | -0.16393 | -4.08765 |
| C | 1.15874  | -0.05663 | -3.21014 |
| C | -0.07121 | -0.66590 | -3.57419 |
| C | -0.15612 | -1.35012 | -4.79961 |
| H | 0.84283  | -1.98334 | -6.59446 |
| H | 3.00523  | -0.91127 | -5.95657 |
| H | 3.19209  | 0.29343  | -3.82103 |
| H | -1.09582 | -1.81113 | -5.07694 |
| H | -3.69811 | -2.11250 | -2.27525 |
| C | -3.57501 | 1.14177  | -1.06279 |
| C | -5.08617 | 0.97251  | -0.79405 |
| H | -5.62458 | 0.55507  | -1.65101 |
| H | -5.26968 | 0.32214  | 0.06898  |
| H | -5.53736 | 1.94512  | -0.57612 |
| C | -3.35616 | 2.02705  | -2.30485 |
| H | -3.80214 | 1.59861  | -3.20888 |
| H | -3.82133 | 3.00566  | -2.15032 |
| H | -2.29200 | 2.19690  | -2.49615 |
| C | -2.94108 | 1.82204  | 0.16518  |
| H | -3.41488 | 2.79333  | 0.34086  |
| H | -3.07847 | 1.22073  | 1.07122  |
| H | -1.86988 | 1.99628  | 0.02469  |
| H | -3.13885 | -0.85243 | -0.34070 |

**Endo-3**

|    | A            | B            | C            |
|----|--------------|--------------|--------------|
|    | -1056412.737 | -1056242.638 | -1056470.224 |
| Pd | -0.01208     | 0.03829      | 0.00640      |
| C  | 0.00422      | 0.09290      | 2.22865      |
| C  | 1.35257      | 0.06090      | 1.87470      |
| C  | -0.87250     | -0.91176     | 1.73066      |
| N  | 1.14937      | 1.00564      | -1.53430     |
| P  | -1.71340     | -0.19427     | -1.58494     |
| H  | 1.99358      | 0.91196      | 2.08013      |
| H  | -1.94167     | -0.81476     | 1.88674      |

|   |          |          |          |
|---|----------|----------|----------|
| H | 1.84799  | -0.88448 | 1.66765  |
| H | -0.50964 | -1.93390 | 1.62911  |
| H | -0.41430 | 1.00579  | 2.64776  |
| C | 2.63668  | 0.96659  | -1.63508 |
| C | 2.92640  | 2.24581  | -2.45258 |
| O | 1.64095  | 2.58519  | -3.03711 |
| C | 0.70475  | 1.88104  | -2.37887 |
| H | 3.63153  | 2.11558  | -3.27225 |
| C | -0.86357 | -3.41789 | -4.80185 |
| C | -0.64154 | -3.68270 | -3.44862 |
| C | -0.88287 | -2.69468 | -2.49530 |
| C | -1.36017 | -1.43253 | -2.88776 |
| C | -1.58317 | -1.17393 | -4.24889 |
| C | -1.33115 | -2.16464 | -5.19932 |
| H | -0.67076 | -4.18640 | -5.54453 |
| H | -0.27725 | -4.65677 | -3.13575 |
| H | -0.70399 | -2.90575 | -1.44418 |
| H | -1.95414 | -0.20611 | -4.57080 |
| H | -1.50443 | -1.95622 | -6.25097 |
| C | -5.98925 | -1.08647 | -0.02051 |
| C | -5.47101 | -1.84133 | -1.07210 |
| C | -4.19120 | -1.57868 | -1.56638 |
| C | -3.41560 | -0.55588 | -1.00224 |
| C | -3.94103 | 0.19832  | 0.06187  |
| C | -5.22234 | -0.06214 | 0.54309  |
| H | -6.98438 | -1.29403 | 0.36082  |
| H | -6.06168 | -2.63808 | -1.51442 |
| H | -3.80290 | -2.17182 | -2.38752 |
| H | -3.35101 | 0.99471  | 0.50900  |
| H | -5.62129 | 0.53023  | 1.36123  |
| C | -2.12548 | 3.89553  | -3.80037 |
| C | -3.23878 | 3.10548  | -3.53434 |
| C | -3.08432 | 1.88582  | -2.87099 |
| C | -1.82661 | 1.43098  | -2.45745 |
| C | -0.68971 | 2.23815  | -2.73003 |
| C | -0.86337 | 3.45852  | -3.40425 |
| H | -2.23140 | 4.84622  | -4.31281 |
| H | -4.22975 | 3.42870  | -3.83877 |
| H | -3.96168 | 1.28077  | -2.67078 |
| H | 0.00700  | 4.06772  | -3.61496 |
| H | 3.24207  | 3.09036  | -1.83262 |
| C | 3.19865  | -0.35166 | -2.25927 |
| C | 4.73810  | -0.23531 | -2.29841 |
| H | 5.08611  | 0.55726  | -2.96877 |
| H | 5.15191  | -0.04103 | -1.30221 |
| H | 5.17314  | -1.17226 | -2.65915 |
| C | 2.65249  | -0.58355 | -3.68127 |
| H | 2.89634  | 0.23965  | -4.36156 |
| H | 3.09366  | -1.49084 | -4.10568 |
| H | 1.56648  | -0.71579 | -3.68064 |
| C | 2.83121  | -1.55140 | -1.36629 |
| H | 3.25389  | -2.47228 | -1.78135 |
| H | 3.23507  | -1.43283 | -0.35425 |
| H | 1.74743  | -1.68767 | -1.29496 |
| H | 3.04468  | 1.05631  | -0.62374 |

**enolate**

|   | A            | B            | C            |
|---|--------------|--------------|--------------|
|   | -218789.8716 | -218733.3019 | -218798.7733 |
| O | 0.00299      | -0.00084     | 0.00103      |
| C | -0.00032     | 0.00033      | 1.27577      |
| C | 1.10715      | 0.00045      | 2.12067      |

|   |          |          |         |
|---|----------|----------|---------|
| C | -1.40956 | -0.02570 | 1.92570 |
| C | 2.48012  | 0.07003  | 1.51537 |
| C | -1.45050 | 0.34670  | 3.41225 |
| C | -0.35042 | -0.40281 | 4.16903 |
| C | 1.03058  | -0.00709 | 3.62536 |
| H | -1.28074 | 1.42828  | 3.52701 |
| H | -2.44117 | 0.14128  | 3.85106 |
| H | -0.50198 | -1.48372 | 4.02904 |
| H | -0.41395 | -0.20940 | 5.25194 |
| H | 1.30222  | 0.97903  | 4.07385 |
| H | 1.78480  | -0.70027 | 4.05141 |
| H | -1.83788 | -1.03205 | 1.78334 |
| H | -2.04248 | 0.64868  | 1.33270 |
| H | 2.37348  | 0.05983  | 0.42545 |
| H | 3.04598  | 0.98382  | 1.79425 |
| H | 3.13691  | -0.77494 | 1.80788 |

**Exo-Re-EXT-1**

|    | A            | B            | C            |
|----|--------------|--------------|--------------|
|    | -1275181.254 | -1274953.919 | -1275255.735 |
| Pd | 0.00000      | 0.00000      | 0.00000      |
| C  | 0.00000      | 0.00000      | 2.33735      |
| C  | 0.33829      | 0.00000      | 5.13474      |
| C  | -1.30557     | -0.08679     | 1.80668      |
| C  | -1.69509     | -1.14602     | 0.97483      |
| C  | 1.33898      | -0.88457     | 4.66448      |
| O  | 2.44051      | -0.52359     | 4.15203      |
| N  | -0.00305     | -0.61645     | -2.16484     |
| P  | 1.91886      | 1.24275      | -0.62838     |
| C  | 1.08832      | -2.39874     | 4.75487      |
| C  | 0.63481      | 1.47148      | 5.22768      |
| C  | -0.95042     | -0.46344     | 5.77442      |
| H  | 0.35446      | 0.90945      | 2.80830      |
| H  | 0.65414      | -0.86864     | 2.39336      |
| H  | -1.97194     | 0.77779      | 1.90956      |
| H  | -2.68740     | -1.14175     | 0.51531      |
| H  | -1.20524     | -2.12259     | 1.05400      |
| H  | 1.70843      | -2.78912     | 5.58240      |
| H  | 1.48902      | -2.86217     | 3.83962      |
| H  | -0.12815     | 2.10306      | 4.72680      |
| H  | 0.65556      | 1.80855      | 6.28187      |
| H  | 1.61881      | 1.68608      | 4.78716      |
| H  | -1.14276     | 0.12851      | 6.68906      |
| H  | -1.81955     | -0.25792     | 5.11285      |
| C  | -1.21287     | -1.13276     | -2.85874     |
| C  | -0.63643     | -2.29276     | -3.71793     |
| O  | 0.79664      | -2.00172     | -3.76979     |
| C  | 1.04104      | -1.10903     | -2.75304     |
| C  | 2.47575      | -0.86841     | -2.50301     |
| C  | 2.99992      | 0.12020      | -1.62491     |
| H  | -0.99958     | -2.32982     | -4.74696     |
| H  | -0.76885     | -3.27410     | -3.24325     |
| H  | -1.91204     | -1.51304     | -2.10568     |
| C  | 3.27490      | 1.40924      | 1.79862      |
| C  | 3.06611      | 2.04090      | 0.56060      |
| C  | 3.72684      | 3.25290      | 0.28833      |
| H  | 2.76714      | 0.48972      | 2.07995      |
| C  | 2.18626      | 2.80172      | -3.01826     |
| C  | 1.50839      | 2.59996      | -1.80613     |

|   |          |          |          |
|---|----------|----------|----------|
| C | 0.47872  | 3.48853  | -1.44953 |
| H | 2.98856  | 2.13031  | -3.31297 |
| C | -1.94674 | -0.02698 | -3.68387 |
| C | -3.17931 | -0.66606 | -4.37442 |
| H | -2.89378 | -1.42480 | -5.11804 |
| H | -3.84600 | -1.13721 | -3.63486 |
| H | -3.75263 | 0.11165  | -4.90012 |
| C | -1.01147 | 0.59271  | -4.74630 |
| H | -0.60417 | -0.16827 | -5.42760 |
| H | -1.57179 | 1.31949  | -5.35225 |
| H | -0.17401 | 1.12243  | -4.27281 |
| C | -2.44417 | 1.07984  | -2.72653 |
| H | -3.00565 | 1.83735  | -3.29370 |
| H | -3.11401 | 0.66166  | -1.95980 |
| H | -1.60440 | 1.57495  | -2.22362 |
| C | 4.13545  | 1.97410  | 2.74057  |
| C | 4.58304  | 3.81135  | 1.23646  |
| H | -0.06057 | 3.34150  | -0.51574 |
| C | 4.79060  | 3.17292  | 2.46164  |
| H | 4.25238  | 1.46061  | 3.69102  |
| H | 5.45526  | 3.61775  | 3.19929  |
| H | 5.08710  | 4.75121  | 1.01925  |
| H | 3.56728  | 3.76393  | -0.65796 |
| C | 4.39235  | 0.20997  | -1.47705 |
| H | 4.80380  | 0.95045  | -0.79828 |
| C | 3.36965  | -1.70394 | -3.19692 |
| H | 2.96013  | -2.45535 | -3.86231 |
| C | 5.25941  | -0.62998 | -2.17273 |
| H | 6.33346  | -0.53227 | -2.03244 |
| C | 4.74456  | -1.59026 | -3.03943 |
| H | 5.40900  | -2.25474 | -3.58662 |
| C | 1.84296  | 3.86973  | -3.85041 |
| H | 2.37741  | 4.01634  | -4.78645 |
| C | 0.14732  | 4.55894  | -2.27794 |
| H | -0.64593 | 5.24293  | -1.98483 |
| C | 0.82698  | 4.75035  | -3.48178 |
| H | 0.56525  | 5.58367  | -4.12956 |
| C | -0.38415 | -2.80314 | 4.98647  |
| H | -0.45229 | -3.87827 | 5.21085  |
| H | -0.97795 | -2.62205 | 4.07476  |
| C | -0.96491 | -1.96799 | 6.14260  |
| H | -1.99117 | -2.28624 | 6.37869  |
| H | -0.35230 | -2.13440 | 7.04375  |

**Endo-Si-EXT-1**

|    | A            | B            | C           |
|----|--------------|--------------|-------------|
|    | -1275182.563 | -1274955.763 | -1275257.94 |
| Pd | 0.00840      | -0.01316     | -0.03356    |
| C  | -0.01072     | -0.02280     | 2.28332     |
| C  | 1.90678      | 0.01082      | 4.83524     |
| C  | 1.14484      | -0.61128     | 1.74168     |
| C  | 1.05676      | -1.76615     | 0.94550     |
| C  | 1.71589      | 1.33839      | 4.41392     |
| O  | 2.27983      | 1.86371      | 3.39586     |
| N  | -0.09416     | -0.48285     | -2.20164    |
| P  | -0.70802     | 2.15341      | -0.69656    |
| C  | 0.73565      | 2.23435      | 5.19277     |
| C  | 3.02402      | -0.80710     | 4.25697     |
| C  | 1.17763      | -0.59326     | 6.01112     |
| H  | 0.04849      | 0.95316      | 2.73654     |
| H  | -0.91479     | -0.60820     | 2.43745     |
| H  | 2.06680      | -0.04159     | 1.82704     |

|   |          |          |          |
|---|----------|----------|----------|
| H | 1.94602  | -2.16265 | 0.46471  |
| H | 0.23125  | -2.46254 | 1.07913  |
| H | -0.15178 | 2.40961  | 4.56425  |
| H | 1.21800  | 3.21446  | 5.29406  |
| H | 3.67867  | -1.20078 | 5.05133  |
| H | 2.67447  | -1.69216 | 3.69484  |
| H | 3.63221  | -0.19521 | 3.58536  |
| H | 0.88326  | -1.62972 | 5.77618  |
| H | 1.86589  | -0.69206 | 6.87346  |
| C | -0.31916 | -1.84586 | -2.73831 |
| C | 0.49264  | -1.81777 | -4.05545 |
| O | 0.74456  | -0.41210 | -4.28449 |
| C | 0.44989  | 0.23677  | -3.12778 |
| C | 0.81801  | 1.66517  | -3.10802 |
| C | 0.40057  | 2.60041  | -2.11741 |
| H | -0.03608 | -2.20390 | -4.92786 |
| H | 1.45938  | -2.32497 | -3.96765 |
| H | 0.11328  | -2.56349 | -2.03415 |
| C | 0.47849  | 3.52633  | 1.40363  |
| C | -0.55610 | 3.57351  | 0.45593  |
| C | -1.41955 | 4.68201  | 0.42954  |
| H | 1.14077  | 2.67009  | 1.49487  |
| C | -2.68475 | 2.94003  | -2.62004 |
| C | -2.40783 | 2.31588  | -1.39435 |
| C | -3.47717 | 1.80768  | -0.63760 |
| H | -1.87477 | 3.34363  | -3.21968 |
| C | -1.83296 | -2.19406 | -2.89684 |
| C | -1.93865 | -3.63245 | -3.44510 |
| H | -1.51518 | -3.73114 | -4.45092 |
| H | -1.42495 | -4.34761 | -2.79176 |
| H | -2.98894 | -3.93570 | -3.50689 |
| C | -2.53891 | -1.21381 | -3.85328 |
| H | -2.09541 | -1.21714 | -4.85561 |
| H | -3.59242 | -1.49169 | -3.96472 |
| H | -2.50638 | -0.19015 | -3.46944 |
| C | -2.51772 | -2.14295 | -1.51731 |
| H | -3.57210 | -2.42684 | -1.60947 |
| H | -2.04601 | -2.83709 | -0.81206 |
| H | -2.47453 | -1.13922 | -1.08560 |
| C | 0.66095  | 4.58243  | 2.29618  |
| C | -1.23362 | 5.73189  | 1.32825  |
| H | -3.27815 | 1.31350  | 0.31006  |
| C | -0.19075 | 5.68632  | 2.25776  |
| H | 1.45891  | 4.49583  | 3.02639  |
| H | -0.05425 | 6.50577  | 2.95861  |
| H | -1.90625 | 6.58543  | 1.30348  |
| H | -2.23360 | 4.72556  | -0.28784 |
| C | 0.86776  | 3.91833  | -2.21605 |
| H | 0.56862  | 4.64041  | -1.46505 |
| C | 1.65641  | 2.10104  | -4.15135 |
| H | 1.96557  | 1.38506  | -4.90294 |
| C | 1.70564  | 4.32930  | -3.25206 |
| H | 2.04525  | 5.36046  | -3.29143 |
| C | 2.09819  | 3.41658  | -4.22768 |
| H | 2.74964  | 3.72158  | -5.04118 |
| C | -4.00085 | 3.05591  | -3.07452 |
| H | -4.19877 | 3.54207  | -4.02612 |
| C | -4.79054 | 1.93508  | -1.08852 |
| H | -5.60605 | 1.54253  | -0.48743 |
| C | -5.05678 | 2.55832  | -2.31015 |
| H | -6.07946 | 2.65313  | -2.66399 |
| C | 0.30469  | 1.69263  | 6.56159  |

|   |          |          |         |
|---|----------|----------|---------|
| H | -0.53810 | 2.27476  | 6.95795 |
| H | 1.12856  | 1.80769  | 7.28050 |
| C | -0.05239 | 0.20737  | 6.45450 |
| H | -0.43345 | -0.17661 | 7.40976 |
| H | -0.85825 | 0.08197  | 5.71654 |

**Exo-Re EXT-2**

|    | A            | B            | C            |
|----|--------------|--------------|--------------|
|    | -1275181.825 | -1274955.525 | -1275256.146 |
| Pd | 0.00000      | 0.00000      | 0.00000      |
| C  | 0.00000      | 0.00000      | 2.43021      |
| C  | 0.76069      | 0.00000      | 5.12049      |
| C  | -0.97433     | -0.79732     | 1.80681      |
| C  | -1.94741     | -0.23224     | 0.93756      |
| C  | 1.40230      | -1.17387     | 4.68085      |
| O  | 2.38426      | -1.18496     | 3.86119      |
| N  | 2.22725      | 0.08624      | -0.20567     |
| P  | -0.07147     | 0.64832      | -2.24904     |
| C  | 0.86243      | -2.53806     | 5.12655      |
| C  | 1.40088      | 1.33766      | 4.85784      |
| C  | -0.38277     | -0.00772     | 6.11610      |
| H  | -2.66430     | -0.87995     | 0.44069      |
| H  | -2.28751     | 0.78827      | 1.10510      |
| H  | -0.86165     | -1.87938     | 1.84083      |
| H  | 0.95168      | -0.40615     | 2.73795      |
| H  | -0.15397     | 1.07253      | 2.51411      |
| H  | 0.90266      | -3.20725     | 4.25756      |
| H  | 1.57595      | -2.95525     | 5.85336      |
| H  | 0.66461      | 2.11677      | 4.60881      |
| H  | 1.94077      | 1.70530      | 5.74635      |
| H  | 2.12993      | 1.26341      | 4.04688      |
| H  | -0.19041     | 0.74320      | 6.89987      |
| H  | -1.31610     | 0.32838      | 5.63058      |
| C  | 3.15561      | -0.66532     | 0.68847      |
| C  | 4.44438      | 0.18203      | 0.60219      |
| O  | 4.21877      | 1.06930      | -0.52668     |
| C  | 2.90367      | 0.98397      | -0.83531     |
| C  | 2.45402      | 1.98216      | -1.84097     |
| C  | 1.20379      | 1.96784      | -2.51949     |
| H  | 5.35279      | -0.38413     | 0.39443      |
| H  | 4.59947      | 0.80313      | 1.48958      |
| H  | 2.76437      | -0.64250     | 1.70989      |
| C  | 3.32481      | -2.16649     | 0.29810      |
| C  | 4.28121      | -2.79911     | 1.33365      |
| H  | 5.29408      | -2.38364     | 1.27528      |
| H  | 3.89906      | -2.64148     | 2.34836      |
| H  | 4.36610      | -3.87699     | 1.15453      |
| C  | 3.87376      | -2.32915     | -1.13111     |
| H  | 4.85000      | -1.84752     | -1.26085     |
| H  | 4.00475      | -3.39089     | -1.36693     |
| H  | 3.18711      | -1.90828     | -1.87332     |
| C  | 1.96671      | -2.88378     | 0.41562      |
| H  | 2.08423      | -3.95090     | 0.19271      |
| H  | 1.57856      | -2.79065     | 1.43473      |
| H  | 1.22907      | -2.47347     | -0.28194     |
| C  | -4.00057     | 2.47953      | -3.92615     |
| C  | -3.22256     | 1.67355      | -4.75762     |
| C  | -2.03199     | 1.11792      | -4.28582     |
| C  | -1.60991     | 1.36116      | -2.96978     |
| C  | -2.40798     | 2.16108      | -2.13605     |
| C  | -3.58964     | 2.72442      | -2.61426     |
| H  | -4.92706     | 2.90966      | -4.29633     |



|   |          |          |          |
|---|----------|----------|----------|
| H | -3.54124 | 1.47481  | -5.77724 |
| H | -1.43464 | 0.49311  | -4.94236 |
| H | -2.10098 | 2.33415  | -1.10801 |
| H | -4.19531 | 3.34484  | -1.95961 |
| C | 0.98350  | -2.74760 | -5.24018 |
| C | 1.53571  | -1.48096 | -5.43293 |
| C | 1.24508  | -0.44462 | -4.54369 |
| C | 0.40113  | -0.66931 | -3.44537 |
| C | -0.13906 | -1.95126 | -3.25236 |
| C | 0.14481  | -2.98077 | -4.14842 |
| H | 1.21110  | -3.55191 | -5.93417 |
| H | 2.19361  | -1.29558 | -6.27785 |
| H | 1.67650  | 0.53816  | -4.70763 |
| H | -0.77830 | -2.13958 | -2.39364 |
| H | -0.28167 | -3.96707 | -3.98843 |
| C | 3.05904  | 4.03946  | -3.01235 |
| C | 3.36057  | 3.02193  | -2.11247 |
| C | 0.92233  | 3.00698  | -3.41818 |
| C | 1.83176  | 4.03477  | -3.66623 |
| H | 3.78015  | 4.83095  | -3.19330 |
| H | 4.31234  | 3.02538  | -1.59644 |
| H | -0.02924 | 3.01319  | -3.93787 |
| H | 1.57591  | 4.82225  | -4.36978 |
| C | -0.62689 | -1.37353 | 6.77635  |
| H | -1.59891 | -1.37933 | 7.28649  |
| H | 0.13576  | -1.54694 | 7.54878  |
| C | -0.54201 | -2.49856 | 5.74039  |
| H | -1.28721 | -2.31979 | 4.95171  |
| H | -0.79177 | -3.46733 | 6.19297  |

**Exo-Si EXT-2**

|    | A            | B            | C           |
|----|--------------|--------------|-------------|
|    | -1275182.332 | -1274955.372 | -1275255.98 |
| Pd | 0.00000      | 0.00000      | 0.00000     |
| C  | 0.00000      | 0.00000      | 2.43460     |
| C  | 0.65221      | 0.00000      | 5.16313     |
| C  | -1.19912     | -0.41694     | 1.83564     |
| C  | -1.91273     | 0.41090      | 0.92630     |
| C  | 1.88827      | 0.24035      | 4.53438     |
| O  | 2.51187      | -0.62058     | 3.82611     |
| N  | 2.17571      | -0.41363     | -0.23302    |
| P  | 0.01375      | 0.50363      | -2.27961    |
| C  | 2.49174      | 1.65125      | 4.56780     |
| C  | 0.16639      | -1.41162     | 5.36360     |
| C  | -0.06656     | 1.05304      | 5.97491     |
| H  | -2.81799     | 0.02598      | 0.44582     |
| H  | -1.89105     | 1.50025      | 1.05605     |
| H  | -1.48295     | -1.47301     | 1.91966     |
| H  | 0.72721      | -0.70774     | 2.82495     |
| H  | 0.27456      | 1.05762      | 2.45711     |
| H  | 3.58145      | 1.53585      | 4.68171     |
| H  | 2.34034      | 2.11831      | 3.57439     |
| H  | 0.23171      | -1.70699     | 6.43118     |
| H  | -0.89319     | -1.54354     | 5.07328     |
| H  | 0.78339      | -2.11510     | 4.78759     |
| H  | -1.15867     | 0.96673      | 5.82002     |
| H  | 0.08706      | 0.87177      | 7.06151     |
| C  | 2.93621      | -1.23878     | 0.75264     |
| C  | 4.34872      | -0.60410     | 0.69412     |
| O  | 4.33270      | 0.17947      | -0.55249    |
| C  | 3.01806      | 0.29165      | -0.91052    |
| C  | 2.79171      | 1.22858      | -2.03901    |

|   |          |          |          |
|---|----------|----------|----------|
| C | 1.56638  | 1.40782  | -2.73306 |
| H | 5.17821  | -1.31050 | 0.61920  |
| H | 4.51022  | 0.08254  | 1.53421  |
| H | 2.53000  | -1.07863 | 1.75942  |
| C | 2.88901  | -2.76174 | 0.41753  |
| C | 3.72326  | -3.50519 | 1.49357  |
| H | 4.79656  | -3.27923 | 1.41022  |
| H | 3.38673  | -3.22184 | 2.50202  |
| H | 3.60399  | -4.59223 | 1.37186  |
| C | 3.44588  | -3.05425 | -0.99327 |
| H | 4.47334  | -2.67810 | -1.11191 |
| H | 3.46443  | -4.14039 | -1.17061 |
| H | 2.81577  | -2.59532 | -1.76886 |
| C | 1.42952  | -3.26580 | 0.50991  |
| H | 1.39460  | -4.34701 | 0.30493  |
| H | 1.02687  | -3.09461 | 1.51895  |
| H | 0.78429  | -2.75402 | -0.21783 |
| C | -3.30986 | 3.18905  | -4.11270 |
| C | -2.85252 | 2.08918  | -4.83777 |
| C | -1.85341 | 1.26643  | -4.31410 |
| C | -1.30436 | 1.53555  | -3.05025 |
| C | -1.78398 | 2.63714  | -2.32089 |
| C | -2.77325 | 3.46164  | -2.85300 |
| H | -4.08764 | 3.82864  | -4.52418 |
| H | -3.27338 | 1.86946  | -5.81676 |
| H | -1.50483 | 0.41249  | -4.88921 |
| H | -1.38330 | 2.84357  | -1.33020 |
| H | -3.13281 | 4.31399  | -2.28062 |
| C | -0.01063 | -3.32187 | -4.91909 |
| C | 0.90483  | -2.30943 | -5.20384 |
| C | 0.93919  | -1.15132 | -4.42436 |
| C | 0.05709  | -0.99839 | -3.34343 |
| C | -0.85229 | -2.03205 | -3.05562 |
| C | -0.88995 | -3.18036 | -3.84401 |
| H | -0.03627 | -4.22164 | -5.52974 |
| H | 1.59510  | -2.41800 | -6.03781 |
| H | 1.65309  | -0.36696 | -4.66205 |
| H | -1.52891 | -1.93449 | -2.20874 |
| H | -1.60165 | -3.97028 | -3.61429 |
| C | 3.84535  | 2.89390  | -3.48096 |
| C | 3.90928  | 1.98423  | -2.43261 |
| C | 1.52511  | 2.33335  | -3.78886 |
| C | 2.64693  | 3.06930  | -4.16479 |
| H | 4.72869  | 3.46489  | -3.75655 |
| H | 4.83704  | 1.84283  | -1.89091 |
| H | 0.59297  | 2.48737  | -4.32360 |
| H | 2.57825  | 3.77788  | -4.98727 |
| C | 0.38077  | 2.50001  | 5.65884  |
| H | -0.04766 | 3.19679  | 6.39502  |
| H | 0.00474  | 2.79828  | 4.66553  |
| C | 1.92074  | 2.57650  | 5.66492  |
| H | 2.29165  | 2.25591  | 6.65262  |
| H | 2.26329  | 3.61177  | 5.51099  |

**Endo-Re EXT-2**

|    | A            | B            | C            |
|----|--------------|--------------|--------------|
|    | -1275181.683 | -1274955.675 | -1275256.676 |
| Pd | 0.00000      | 0.00000      | 0.00000      |
| C  | 0.00000      | 0.00000      | 2.43136      |
| C  | 0.44076      | 0.00000      | 5.09180      |
| C  | -0.73507     | 1.03179      | 1.82295      |
| C  | -1.80692     | 0.75715      | 0.93470      |

|   |          |          |          |
|---|----------|----------|----------|
| C | 1.07765  | -1.18785 | 4.67548  |
| O | 2.15145  | -1.21986 | 3.98708  |
| C | 0.42616  | -2.53938 | 5.00459  |
| C | 1.17042  | 1.31606  | 5.00325  |
| C | -0.84091 | 0.00897  | 5.90239  |
| H | -2.32937 | 1.57834  | 0.45306  |
| H | -2.39690 | -0.14892 | 1.06578  |
| H | -0.35255 | 2.04896  | 1.88901  |
| H | 0.99947  | 0.13932  | 2.80482  |
| H | -0.40247 | -1.00608 | 2.47769  |
| H | 0.55214  | -3.19338 | 4.13279  |
| H | 1.02173  | -3.00135 | 5.80667  |
| H | 0.56738  | 2.10818  | 4.53176  |
| H | 1.43413  | 1.69203  | 6.00509  |
| H | 2.10023  | 1.19993  | 4.43990  |
| H | -0.74650 | 0.73545  | 6.72544  |
| H | -1.67833 | 0.38925  | 5.28996  |
| N | 2.11902  | -0.67123 | -0.25637 |
| P | -0.12256 | -0.17985 | -2.34075 |
| C | 2.90641  | -1.40974 | 0.77107  |
| C | 4.32958  | -0.87123 | 0.52030  |
| O | 4.25810  | -0.28620 | -0.81198 |
| C | 2.94177  | -0.14267 | -1.09334 |
| C | 2.65721  | 0.61918  | -2.33591 |
| C | 1.39528  | 0.67694  | -2.99020 |
| H | 5.11247  | -1.62940 | 0.50184  |
| H | 4.60930  | -0.07569 | 1.21855  |
| H | 2.55620  | -1.12847 | 1.76909  |
| C | 2.76003  | -2.96119 | 0.65924  |
| C | 3.55543  | -3.57388 | 1.83302  |
| H | 4.63434  | -3.40262 | 1.73578  |
| H | 3.22066  | -3.14307 | 2.78338  |
| H | 3.40477  | -4.65918 | 1.86222  |
| C | 3.27646  | -3.49946 | -0.68804 |
| H | 4.33334  | -3.26220 | -0.85621 |
| H | 3.18339  | -4.59085 | -0.71543 |
| H | 2.70011  | -3.10026 | -1.52936 |
| C | 1.27888  | -3.34823 | 0.82885  |
| H | 1.17041  | -4.43898 | 0.80596  |
| H | 0.89859  | -2.99043 | 1.78962  |
| H | 0.65735  | -2.93188 | 0.03025  |
| C | -3.65476 | 1.89761  | -4.53907 |
| C | -3.17158 | 0.68455  | -5.02935 |
| C | -2.10176 | 0.04638  | -4.39840 |
| C | -1.50829 | 0.61528  | -3.26181 |
| C | -2.00915 | 1.83122  | -2.76932 |
| C | -3.06781 | 2.47225  | -3.40928 |
| H | -4.48821 | 2.39129  | -5.03130 |
| H | -3.62636 | 0.23090  | -5.90599 |
| H | -1.73270 | -0.89546 | -4.79162 |
| H | -1.56792 | 2.26959  | -1.87834 |
| H | -3.44293 | 3.41460  | -3.01974 |
| C | -0.02304 | -4.45937 | -4.15024 |
| C | 0.85052  | -3.49391 | -4.65099 |
| C | 0.84627  | -2.20058 | -4.12459 |
| C | -0.02953 | -1.86361 | -3.08196 |
| C | -0.89647 | -2.84625 | -2.57545 |
| C | -0.89822 | -4.13253 | -3.11209 |
| H | -0.01792 | -5.46458 | -4.56246 |
| H | 1.53656  | -3.74428 | -5.45573 |
| H | 1.52416  | -1.45562 | -4.52948 |
| H | -1.56688 | -2.60159 | -1.75548 |

|   |          |          |          |
|---|----------|----------|----------|
| H | -1.57549 | -4.88218 | -2.71268 |
| C | 3.61390  | 2.06475  | -4.05570 |
| C | 3.74476  | 1.31496  | -2.89019 |
| C | 1.29134  | 1.43508  | -4.16408 |
| C | 2.38115  | 2.12546  | -4.69594 |
| H | 4.47224  | 2.59741  | -4.45446 |
| H | 4.70259  | 1.26168  | -2.38738 |
| H | 0.33639  | 1.49120  | -4.67439 |
| H | 2.25844  | 2.70529  | -5.60664 |
| C | -1.22592 | -1.36062 | 6.48219  |
| H | -2.25808 | -1.33845 | 6.85534  |
| H | -0.58314 | -1.58531 | 7.34521  |
| C | -1.04395 | -2.46213 | 5.43426  |
| H | -1.67676 | -2.23833 | 4.56251  |
| H | -1.38193 | -3.43239 | 5.82208  |

**Endo-Si EXT-2**

|    | A            | B            | C            |
|----|--------------|--------------|--------------|
|    | -1275181.545 | -1274955.431 | -1275256.919 |
| Pd | 0.00000      | 0.00000      | 0.00000      |
| C  | 0.00000      | 0.00000      | 2.40919      |
| C  | 1.28893      | 0.00000      | 4.88502      |
| C  | -0.72791     | -1.05584     | 1.84302      |
| C  | -0.13913     | -1.95797     | 0.92083      |
| C  | 1.33375      | 1.33900      | 4.46861      |
| O  | 2.03232      | 1.76706      | 3.48623      |
| C  | 0.40563      | 2.36756      | 5.13016      |
| C  | 2.33429      | -0.97767     | 4.41685      |
| C  | 0.41401      | -0.46964     | 6.02493      |
| H  | -0.75142     | -2.72651     | 0.45872      |
| H  | 0.91966      | -2.19857     | 1.00477      |
| H  | -1.81104     | -1.06180     | 1.95613      |
| H  | -0.52639     | 0.82823      | 2.86144      |
| H  | 1.07862      | 0.06392      | 2.40626      |
| H  | 0.98268      | 3.29411      | 5.23757      |
| H  | -0.40132     | 2.60715      | 4.41642      |
| H  | 2.99394      | -1.28590     | 5.24502      |
| H  | 1.89739      | -1.90677     | 4.01743      |
| H  | 2.96381      | -0.52506     | 3.64599      |
| H  | 0.00346      | -1.46519     | 5.79066      |
| H  | 1.02685      | -0.62835     | 6.93348      |
| N  | 0.28713      | 2.18725      | -0.27563     |
| P  | -0.02100     | -0.07694     | -2.34890     |
| C  | 1.04000      | 3.08272      | 0.64802      |
| C  | 0.24638      | 4.39760      | 0.50610      |
| O  | -0.48741     | 4.23835      | -0.74411     |
| C  | -0.46351     | 2.91481      | -1.02512     |
| C  | -1.32344     | 2.49999      | -2.16094     |
| C  | -1.23195     | 1.25027      | -2.83553     |
| H  | 0.85726      | 5.29504      | 0.41280      |
| H  | -0.49023     | 4.54010      | 1.30440      |
| H  | 0.98768      | 2.68005      | 1.66534      |
| C  | 2.56014      | 3.19138      | 0.29853      |
| C  | 3.20511      | 4.09980      | 1.36904      |
| H  | 2.83270      | 5.13090      | 1.32319      |
| H  | 3.01405      | 3.69493      | 2.36827      |
| H  | 4.28889      | 4.14459      | 1.21303      |
| C  | 2.79303      | 3.76871      | -1.11022     |
| H  | 2.36129      | 4.76929      | -1.23230     |
| H  | 3.86802      | 3.85673      | -1.30251     |
| H  | 2.37506      | 3.12092      | -1.88780     |
| C  | 3.20692      | 1.79690      | 0.40754      |

|   |          |          |          |
|---|----------|----------|----------|
| H | 4.28074  | 1.86835  | 0.19683  |
| H | 3.07641  | 1.40209  | 1.41936  |
| H | 2.77308  | 1.09741  | -0.31419 |
| C | -1.60933 | -3.93386 | -4.40523 |
| C | -0.61952 | -3.18467 | -5.04128 |
| C | -0.13616 | -2.01393 | -4.45422 |
| C | -0.63660 | -1.58248 | -3.21624 |
| C | -1.62648 | -2.34902 | -2.57977 |
| C | -2.11509 | -3.51101 | -3.17403 |
| H | -1.98117 | -4.84628 | -4.86313 |
| H | -0.21923 | -3.51062 | -5.99752 |
| H | 0.63386  | -1.44036 | -4.95999 |
| H | -2.00673 | -2.03286 | -1.61222 |
| H | -2.88217 | -4.09294 | -2.67057 |
| C | 3.88724  | 0.85978  | -4.68140 |
| C | 2.71097  | 1.51798  | -5.04102 |
| C | 1.52403  | 1.26433  | -4.35073 |
| C | 1.50584  | 0.35122  | -3.28596 |
| C | 2.69748  | -0.29818 | -2.92389 |
| C | 3.87807  | -0.05008 | -3.62219 |
| H | 4.80941  | 1.05962  | -5.21998 |
| H | 2.71369  | 2.23022  | -5.86172 |
| H | 0.61349  | 1.77683  | -4.64540 |
| H | 2.69996  | -0.99444 | -2.08928 |
| H | 4.79267  | -0.55931 | -3.33189 |
| C | -3.14890 | 3.16630  | -3.63656 |
| C | -2.27946 | 3.43722  | -2.58338 |
| C | -2.11656 | 1.00384  | -3.89370 |
| C | -3.06792 | 1.94366  | -4.29355 |
| H | -3.88380 | 3.90785  | -3.93534 |
| H | -2.33482 | 4.38770  | -2.06654 |
| H | -2.06403 | 0.05625  | -4.41803 |
| H | -3.73812 | 1.71321  | -5.11709 |
| C | -0.72942 | 0.49440  | 6.36473  |
| H | -1.22055 | 0.18943  | 7.29784  |
| H | -1.49427 | 0.44981  | 5.57553  |
| C | -0.19818 | 1.92709  | 6.46872  |
| H | 0.57418  | 1.96412  | 7.25014  |
| H | -0.99038 | 2.62031  | 6.78170  |

**R-4**

|    | A            | B            | C            |
|----|--------------|--------------|--------------|
|    | -1275216.128 | -1274993.689 | -1275289.721 |
| Pd | 0.23152      | 0.12915      | -0.08725     |
| C  | -0.07453     | 0.33076      | 2.99761      |
| C  | 0.49370      | 0.44947      | 4.43887      |
| C  | 0.86604      | 0.76708      | 1.88665      |
| C  | 0.62581      | 1.89820      | 1.09115      |
| C  | 1.54572      | -0.64739     | 4.69609      |
| O  | 1.91331      | -1.43080     | 3.83397      |
| N  | 0.60841      | -2.21976     | -0.38485     |
| P  | -0.48134     | -0.15281     | -2.30954     |
| C  | 2.04914      | -0.77826     | 6.12955      |
| C  | 1.11274      | 1.84880      | 4.66236      |
| C  | -0.66273     | 0.20286      | 5.45965      |
| H  | 1.44818      | 2.41695      | 0.60279      |
| H  | -0.27495     | 2.49300      | 1.23639      |
| H  | 1.88807      | 0.40194      | 1.97612      |
| H  | -0.37994     | -0.71199     | 2.86025      |
| H  | -0.99109     | 0.93346      | 2.94408      |
| H  | 2.57585      | 0.14023      | 6.41918      |
| H  | 2.76532      | -1.60379     | 6.16280      |

|   |          |          |          |
|---|----------|----------|----------|
| H | 1.46690  | 1.99880  | 5.68551  |
| H | 0.35756  | 2.61544  | 4.45542  |
| H | 1.94965  | 2.02481  | 3.98167  |
| H | -1.39292 | 1.01547  | 5.35538  |
| H | -1.18392 | -0.72091 | 5.17046  |
| C | 0.81364  | -3.06265 | 0.81676  |
| C | 2.14563  | -3.78412 | 0.50042  |
| O | 2.32931  | -3.57830 | -0.92045 |
| C | 1.44708  | -2.60218 | -1.28449 |
| C | 1.58766  | -2.13275 | -2.68172 |
| C | 0.79988  | -1.10212 | -3.27159 |
| H | 2.14305  | -4.86039 | 0.68185  |
| H | 2.99543  | -3.33286 | 1.02327  |
| H | 0.93981  | -2.40733 | 1.68266  |
| C | -0.40261 | -4.00149 | 1.09845  |
| C | -0.10629 | -4.79364 | 2.38892  |
| H | 0.74540  | -5.47381 | 2.27525  |
| H | 0.11455  | -4.11888 | 3.22391  |
| H | -0.97292 | -5.40348 | 2.66765  |
| C | -0.65180 | -4.97196 | -0.07194 |
| H | 0.21925  | -5.60205 | -0.28489 |
| H | -1.48716 | -5.64053 | 0.16431  |
| H | -0.91075 | -4.42801 | -0.98528 |
| C | -1.66794 | -3.15066 | 1.31982  |
| H | -2.52625 | -3.79910 | 1.53273  |
| H | -1.54550 | -2.47128 | 2.17044  |
| H | -1.90331 | -2.54902 | 0.43922  |
| C | -4.38932 | -2.66900 | -2.65176 |
| C | -3.28889 | -3.02777 | -3.42972 |
| C | -2.10068 | -2.29653 | -3.34912 |
| C | -1.99560 | -1.20160 | -2.48007 |
| C | -3.10604 | -0.85790 | -1.69101 |
| C | -4.29511 | -1.57980 | -1.78250 |
| H | -5.31327 | -3.23739 | -2.71728 |
| H | -3.35328 | -3.87644 | -4.10598 |
| H | -1.25545 | -2.58004 | -3.96913 |
| H | -3.02934 | -0.02388 | -0.99792 |
| H | -5.14564 | -1.29761 | -1.16746 |
| C | -1.51210 | 3.55085  | -4.94125 |
| C | -0.58000 | 3.62892  | -3.90525 |
| C | -0.28398 | 2.49804  | -3.14381 |
| C | -0.90149 | 1.26849  | -3.41903 |
| C | -1.84004 | 1.20200  | -4.46162 |
| C | -2.14302 | 2.33613  | -5.21575 |
| H | -1.75347 | 4.43435  | -5.52638 |
| H | -0.09381 | 4.57432  | -3.67935 |
| H | 0.41549  | 2.56196  | -2.31388 |
| H | -2.34312 | 0.26439  | -4.67908 |
| H | -2.87659 | 2.27154  | -6.01540 |
| C | 1.06293  | -0.75834 | -4.60664 |
| H | 0.48190  | 0.03054  | -5.07072 |
| C | 2.57729  | -2.76605 | -3.45624 |
| H | 3.16991  | -3.54796 | -2.99733 |
| C | 2.04792  | -1.39806 | -5.35976 |
| H | 2.21344  | -1.10152 | -6.39199 |
| C | 2.80848  | -2.41097 | -4.78158 |
| H | 3.57996  | -2.92016 | -5.35166 |
| C | 0.86037  | -1.01057 | 7.08958  |
| H | 0.41818  | -1.99242 | 6.87222  |
| H | 1.22051  | -1.05119 | 8.12413  |
| C | -0.20822 | 0.07908  | 6.92319  |
| H | -1.07497 | -0.14682 | 7.55622  |

H 0.18746 1.03900 7.27920

S-4

|    | A            | B            | C            |
|----|--------------|--------------|--------------|
|    | -1275215.032 | -1274992.752 | -1275288.457 |
| Pd | 0.08836      | -0.04733     | -0.02569     |
| C  | -0.01518     | -0.09513     | 3.08648      |
| C  | 0.67668      | -0.04640     | 4.47706      |
| C  | 0.80398      | 0.48598      | 1.94689      |
| C  | 0.43862      | 1.65291      | 1.25308      |
| C  | 1.91928      | -0.96296     | 4.47874      |
| O  | 2.05725      | -1.87043     | 3.67287      |
| N  | 0.50886      | -2.33595     | -0.48341     |
| P  | -0.62828     | -0.14449     | -2.26371     |
| C  | 2.95114      | -0.75040     | 5.58382      |
| C  | -0.29822     | -0.64223     | 5.52708      |
| C  | 1.05290      | 1.41167      | 4.85679      |
| H  | 1.19408      | 2.26565      | 0.76523      |
| H  | -0.48757     | 2.17111      | 1.49802      |
| H  | 1.85452      | 0.19497      | 1.93970      |
| H  | -0.26122     | -1.14373     | 2.89235      |
| H  | -0.96948     | 0.44327      | 3.15901      |
| H  | 3.83764      | -1.33730     | 5.32631      |
| H  | 2.53396      | -1.18565     | 6.50435      |
| H  | 0.12009      | -0.64940     | 6.53832      |
| H  | -1.21776     | -0.04718     | 5.55164      |
| H  | -0.56781     | -1.67117     | 5.26644      |
| H  | 1.53046      | 1.88170      | 3.98891      |
| H  | 0.12430      | 1.97067      | 5.03251      |
| C  | 0.67636      | -3.30938     | 0.62154      |
| C  | 1.97472      | -4.05055     | 0.22331      |
| O  | 2.16568      | -3.70384     | -1.16913     |
| C  | 1.32802      | -2.65699     | -1.42331     |
| C  | 1.49380      | -2.04608     | -2.76252     |
| C  | 0.70517      | -0.97246     | -3.26904     |
| H  | 1.92442      | -5.13877     | 0.28922      |
| H  | 2.84391      | -3.69465     | 0.78630      |
| H  | 0.83294      | -2.75575     | 1.55148      |
| C  | -0.58183     | -4.21703     | 0.80472      |
| C  | -0.32523     | -5.15662     | 2.00118      |
| H  | 0.50116      | -5.85235     | 1.81659      |
| H  | -0.08683     | -4.58699     | 2.90686      |
| H  | -1.21648     | -5.75970     | 2.20796      |
| C  | -0.87231     | -5.04417     | -0.46260     |
| H  | -0.03256     | -5.69143     | -0.74059     |
| H  | -1.74135     | -5.69125     | -0.29887     |
| H  | -1.09882     | -4.39509     | -1.31372     |
| C  | -1.80689     | -3.33745     | 1.12080      |
| H  | -2.69202     | -3.96565     | 1.27702      |
| H  | -1.64967     | -2.74986     | 2.03211      |
| H  | -2.01990     | -2.64295     | 0.30514      |
| C  | -4.47452     | -2.66394     | -3.02634     |
| C  | -3.34365     | -2.91285     | -3.80383     |
| C  | -2.17101     | -2.18156     | -3.59584     |
| C  | -2.11244     | -1.19708     | -2.59890     |
| C  | -3.25333     | -0.96511     | -1.81260     |
| C  | -4.42651     | -1.68630     | -2.02994     |
| H  | -5.38650     | -3.23146     | -3.19179     |
| H  | -3.37224     | -3.67428     | -4.57932     |
| H  | -1.30218     | -2.37667     | -4.21737     |
| H  | -3.21395     | -0.21744     | -1.02419     |
| H  | -5.30132     | -1.49048     | -1.41545     |

|   |          |          |          |
|---|----------|----------|----------|
| C | -1.62710 | 3.78654  | -4.55887 |
| C | -0.71893 | 3.77043  | -3.49892 |
| C | -0.43351 | 2.57446  | -2.84016 |
| C | -1.03683 | 1.37349  | -3.24351 |
| C | -1.95133 | 1.40172  | -4.30900 |
| C | -2.24436 | 2.60063  | -4.96005 |
| H | -1.86045 | 4.72000  | -5.06414 |
| H | -0.24348 | 4.69227  | -3.17445 |
| H | 0.24686  | 2.56299  | -1.99220 |
| H | -2.44299 | 0.48705  | -4.62650 |
| H | -2.95918 | 2.60841  | -5.77909 |
| C | 1.00021  | -0.49286 | -4.55373 |
| H | 0.41884  | 0.32950  | -4.95493 |
| C | 2.51400  | -2.58577 | -3.56728 |
| H | 3.10542  | -3.40241 | -3.17215 |
| C | 2.01782  | -1.03908 | -5.33596 |
| H | 2.20847  | -0.63623 | -6.32725 |
| C | 2.77820  | -2.09478 | -4.84200 |
| H | 3.57429  | -2.53211 | -5.43728 |
| C | 3.27698  | 0.73278  | 5.83558  |
| H | 3.95644  | 0.82168  | 6.69135  |
| H | 3.81295  | 1.13941  | 4.96703  |
| C | 1.99335  | 1.54038  | 6.06328  |
| H | 1.49885  | 1.19339  | 6.98091  |
| H | 2.23533  | 2.59764  | 6.22615  |

**Exo-5**

|    | A           | B            | C            |
|----|-------------|--------------|--------------|
|    | -1275186.07 | -1274962.105 | -1275269.019 |
| Pd | 0.14141     | -0.10303     | 0.00512      |
| C  | 0.29480     | -0.16403     | 2.28836      |
| O  | 2.73196     | -0.13582     | -0.06000     |
| C  | -0.33037    | 1.01560      | 1.87451      |
| C  | 0.34300     | 1.82797      | 0.92068      |
| C  | 3.59139     | -1.04266     | -0.43658     |
| C  | 4.53913     | -0.61917     | -1.56505     |
| C  | 3.69439     | -2.30578     | 0.11123      |
| C  | 2.87062     | -2.67140     | 1.31641      |
| C  | 4.73252     | -3.31703     | -0.32946     |
| H  | -0.17423    | 2.67487      | 0.47924      |
| H  | -0.25129    | -0.89683     | 2.87489      |
| H  | 1.42919     | 1.88760      | 0.94153      |
| H  | 1.37806     | -0.24731     | 2.26332      |
| H  | -1.38825    | 1.17272      | 2.07579      |
| N  | -0.11562    | -2.17528     | -0.62798     |
| P  | 0.18149     | 0.46127      | -2.23952     |
| H  | 3.97457     | -0.59418     | -2.50852     |
| H  | 4.83586     | 0.41900      | -1.36718     |
| H  | 2.84494     | -3.75955     | 1.47045      |
| H  | 3.26500     | -2.23433     | 2.25078      |
| H  | 1.84064     | -2.30696     | 1.22643      |
| H  | 4.27834     | -4.32112     | -0.38231     |
| H  | 5.52780     | -3.41316     | 0.43497      |
| C  | -0.74594    | -3.22220     | 0.21430      |
| C  | -0.00711    | -4.49448     | -0.25383     |
| O  | 0.56224     | -4.11576     | -1.52737     |
| C  | 0.53837     | -2.76011     | -1.58280     |
| H  | -0.64585    | -5.36143     | -0.42630     |
| C  | 1.09579     | -0.83030     | -3.18867     |
| C  | 1.18440     | -2.18854     | -2.78086     |
| H  | 0.81320     | -4.76959     | 0.41496      |
| C  | -2.30217    | -3.26997     | 0.07068      |



|   |          |          |          |
|---|----------|----------|----------|
| C | -2.83241 | -4.39425 | 0.98513  |
| H | -2.49434 | -5.38788 | 0.67208  |
| H | -2.51644 | -4.24374 | 2.02424  |
| H | -3.92726 | -4.40646 | 0.97055  |
| C | -2.72547 | -3.53410 | -1.38697 |
| H | -2.31795 | -4.47383 | -1.77574 |
| H | -3.81677 | -3.59816 | -1.45588 |
| H | -2.39948 | -2.72376 | -2.04573 |
| C | -2.91333 | -1.93595 | 0.54032  |
| H | -4.00646 | -1.97890 | 0.47164  |
| H | -2.65336 | -1.72609 | 1.58446  |
| H | -2.56367 | -1.09847 | -0.06901 |
| H | -0.51339 | -3.00955 | 1.26151  |
| C | 2.36624  | 4.42958  | -3.24261 |
| C | 1.15861  | 4.14400  | -3.88050 |
| C | 0.48242  | 2.95302  | -3.60508 |
| C | 1.01412  | 2.04066  | -2.68189 |
| C | 2.22621  | 2.33233  | -2.03100 |
| C | 2.89512  | 3.52149  | -2.32137 |
| H | 2.89059  | 5.35640  | -3.45974 |
| H | 0.73911  | 4.84641  | -4.59603 |
| H | -0.45559 | 2.74034  | -4.10886 |
| H | 2.62588  | 1.61651  | -1.30763 |
| H | 3.83437  | 3.74047  | -1.82017 |
| C | -4.01346 | 0.80216  | -4.22392 |
| C | -2.99222 | 0.14710  | -4.91193 |
| C | -1.72316 | 0.02718  | -4.34160 |
| C | -1.46444 | 0.55816  | -3.06942 |
| C | -2.50380 | 1.20304  | -2.37910 |
| C | -3.76618 | 1.33194  | -2.95555 |
| H | -4.99969 | 0.89441  | -4.67050 |
| H | -3.18026 | -0.27246 | -5.89659 |
| H | -0.93655 | -0.48153 | -4.88954 |
| H | -2.31890 | 1.59642  | -1.38279 |
| H | -4.55896 | 1.83814  | -2.41160 |
| C | 1.71594  | -0.45006 | -4.39051 |
| H | 1.67029  | 0.58914  | -4.69975 |
| C | 1.88056  | -3.09801 | -3.60419 |
| H | 1.95007  | -4.13101 | -3.28795 |
| C | 2.39520  | -1.36448 | -5.19124 |
| H | 2.86215  | -1.03200 | -6.11410 |
| C | 2.47891  | -2.69916 | -4.79202 |
| H | 3.01120  | -3.42575 | -5.39847 |
| C | 5.78048  | -1.50670 | -1.72191 |
| H | 6.48602  | -1.30076 | -0.90412 |
| H | 6.30833  | -1.26796 | -2.65539 |
| C | 5.38547  | -2.98460 | -1.67777 |
| H | 6.25728  | -3.63029 | -1.84854 |
| H | 4.67500  | -3.18731 | -2.49087 |

**Re-INT-1**

|    | A            | B            | C            |
|----|--------------|--------------|--------------|
|    | -1275177.837 | -1274951.899 | -1275255.136 |
| Pd | -0.47764     | -0.16768     | 0.11037      |
| C  | -0.53580     | -1.49659     | 1.91147      |
| C  | 2.25809      | 2.75539      | 2.16584      |
| O  | 1.50721      | 1.09026      | 0.64468      |
| P  | -0.80050     | 1.23977      | -1.72985     |
| C  | 2.16841      | 1.46094      | 1.71867      |
| C  | -1.80921     | -1.42557     | 1.31547      |
| C  | -2.39416     | -0.14433     | 1.15150      |
| N  | 1.23949      | -0.89970     | -1.35839     |

|   |          |          |          |
|---|----------|----------|----------|
| C | 2.93492  | 0.34298  | 2.42918  |
| C | 1.51963  | 3.87653  | 1.49118  |
| C | 3.10967  | 3.16687  | 3.34792  |
| H | -3.30856 | -0.03446 | 0.56135  |
| H | 0.02192  | -2.43762 | 1.90393  |
| H | -2.23191 | 0.62956  | 1.91054  |
| H | -0.23411 | -0.76458 | 2.66705  |
| H | -2.21928 | -2.29122 | 0.78357  |
| H | 2.27279  | -0.53639 | 2.49668  |
| H | 3.77903  | 0.04026  | 1.78216  |
| H | 0.86395  | 4.42043  | 2.20077  |
| H | 2.21438  | 4.63346  | 1.07653  |
| H | 0.90865  | 3.49857  | 0.66289  |
| H | 2.47174  | 3.41059  | 4.22333  |
| H | 3.64333  | 4.10650  | 3.10947  |
| C | 1.89668  | -2.20206 | -1.09768 |
| C | 3.37488  | -1.79832 | -0.82061 |
| O | 3.46217  | -0.42935 | -1.32761 |
| C | 2.17016  | -0.00525 | -1.49342 |
| H | 4.12333  | -2.39242 | -1.35223 |
| C | 0.79424  | 2.02787  | -2.19430 |
| C | 2.03541  | 1.37862  | -1.97605 |
| H | 3.60582  | -1.77650 | 0.25076  |
| C | 1.70061  | -3.19466 | -2.28992 |
| C | 2.43969  | -4.51893 | -1.97466 |
| H | 3.52978  | -4.38224 | -1.92181 |
| H | 2.09671  | -4.94400 | -1.01811 |
| H | 2.23715  | -5.25705 | -2.76508 |
| C | 2.23579  | -2.59235 | -3.60820 |
| H | 3.29413  | -2.30344 | -3.52414 |
| H | 2.15038  | -3.33139 | -4.41937 |
| H | 1.65392  | -1.70441 | -3.88973 |
| C | 0.19136  | -3.49687 | -2.44056 |
| H | 0.02863  | -4.20325 | -3.26918 |
| H | -0.20571 | -3.95507 | -1.52062 |
| H | -0.37337 | -2.57891 | -2.64464 |
| H | 1.45521  | -2.66500 | -0.20582 |
| C | -3.72603 | 4.79952  | -1.11416 |
| C | -3.70460 | 4.14647  | -2.34589 |
| C | -2.83131 | 3.07853  | -2.56159 |
| C | -1.97077 | 2.64982  | -1.53909 |
| C | -2.00656 | 3.30848  | -0.29757 |
| C | -2.87299 | 4.38026  | -0.09166 |
| H | -4.40677 | 5.63211  | -0.94977 |
| H | -4.36946 | 4.46882  | -3.14463 |
| H | -2.82533 | 2.57704  | -3.52587 |
| H | -1.34726 | 2.98281  | 0.50408  |
| H | -2.88461 | 4.88726  | 0.87072  |
| C | -2.35901 | -0.86162 | -5.57322 |
| C | -1.29193 | 0.03092  | -5.66629 |
| C | -0.80496 | 0.66888  | -4.52342 |
| C | -1.38137 | 0.41421  | -3.26965 |
| C | -2.44673 | -0.49775 | -3.18476 |
| C | -2.93684 | -1.12390 | -4.32969 |
| H | -2.73751 | -1.35522 | -6.46568 |
| H | -0.83565 | 0.23533  | -6.63268 |
| H | 0.02426  | 1.36638  | -4.60774 |
| H | -2.88882 | -0.72125 | -2.21586 |
| H | -3.76609 | -1.82373 | -4.25095 |
| C | 0.79307  | 3.33733  | -2.69617 |
| H | -0.15155 | 3.85384  | -2.84044 |
| C | 3.21983  | 2.06649  | -2.28232 |

|   |         |          |          |
|---|---------|----------|----------|
| H | 4.16446 | 1.56492  | -2.10446 |
| C | 1.98069 | 4.00181  | -2.99891 |
| H | 1.95025 | 5.01645  | -3.38949 |
| C | 3.19824 | 3.36013  | -2.78744 |
| C | 3.46829 | 0.71683  | 3.83061  |
| H | 4.17347 | -0.04824 | 4.19065  |
| H | 2.63407 | 0.75448  | 4.55052  |
| C | 4.14434 | 2.09939  | 3.77359  |
| H | 4.96745 | 2.06928  | 3.04124  |
| H | 4.58152 | 2.36198  | 4.74881  |
| H | 4.13377 | 3.86894  | -3.00873 |

**Si-INT-1**

|    | A            | B            | C            |
|----|--------------|--------------|--------------|
|    | -1275180.351 | -1274954.451 | -1275257.653 |
| Pd | -0.25038     | -0.15303     | 0.13072      |
| C  | -0.11488     | -1.43802     | 1.94911      |
| C  | 2.93559      | 0.71365      | 2.82047      |
| O  | 1.92275      | 0.64237      | 0.66734      |
| P  | -0.71867     | 1.26181      | -1.66432     |
| C  | 2.20207      | 1.25978      | 1.79492      |
| C  | -1.46122     | -1.33280     | 1.55739      |
| C  | -2.01300     | -0.03517     | 1.40640      |
| N  | 1.30090      | -0.91719     | -1.55140     |
| C  | 1.65466      | 2.68479      | 1.91529      |
| C  | 3.55927      | -0.64985     | 2.69744      |
| C  | 3.27777      | 1.46676      | 4.08862      |
| H  | -2.99824     | 0.08559      | 0.94582      |
| H  | 0.39459      | -2.40421     | 1.88588      |
| H  | -1.71911     | 0.76478      | 2.09560      |
| H  | 0.36150      | -0.68746     | 2.59140      |
| H  | -1.98016     | -2.19981     | 1.13299      |
| H  | 1.77540      | 3.16991      | 0.93360      |
| H  | 0.56418      | 2.63618      | 2.10221      |
| H  | 4.66655      | -0.59368     | 2.71864      |
| H  | 3.27142      | -1.31925     | 3.53124      |
| H  | 3.26162      | -1.11901     | 1.75038      |
| H  | 4.34448      | 1.77679      | 4.08007      |
| H  | 3.18001      | 0.79330      | 4.96136      |
| C  | 1.95126      | -2.23919     | -1.37457     |
| C  | 3.46439      | -1.87726     | -1.32350     |
| O  | 3.51295      | -0.53156     | -1.89350     |
| C  | 2.22707      | -0.06253     | -1.83934     |
| H  | 4.11504      | -2.51337     | -1.92942     |
| C  | 0.83907      | 2.03866      | -2.26614     |
| C  | 2.07684      | 1.34858      | -2.23120     |
| H  | 3.83903      | -1.81919     | -0.29582     |
| C  | 1.55436      | -3.23760     | -2.50903     |
| C  | 2.29570      | -4.57889     | -2.28244     |
| H  | 3.38472      | -4.47391     | -2.39373     |
| H  | 2.08709      | -4.97965     | -1.27797     |
| H  | 1.95787      | -5.32148     | -3.02061     |
| C  | 1.90954      | -2.66712     | -3.90055     |
| H  | 2.97460      | -2.40082     | -3.97060     |
| H  | 1.69471      | -3.41548     | -4.67847     |
| H  | 1.31284      | -1.76987     | -4.11345     |
| C  | 0.03231      | -3.49883     | -2.43381     |
| H  | -0.26606     | -4.21651     | -3.21352     |
| H  | -0.23925     | -3.92664     | -1.45571     |
| H  | -0.53235     | -2.56980     | -2.57734     |
| H  | 1.63179      | -2.67262     | -0.41876     |
| C  | -3.55288     | 4.86661      | -0.87608     |

|   |          |          |          |
|---|----------|----------|----------|
| C | -3.68061 | 4.15025  | -2.06505 |
| C | -2.83648 | 3.07002  | -2.33065 |
| C | -1.85443 | 2.69151  | -1.40176 |
| C | -1.73948 | 3.41536  | -0.20143 |
| C | -2.57810 | 4.49851  | 0.05351  |
| H | -4.21165 | 5.70811  | -0.67220 |
| H | -4.43996 | 4.43175  | -2.79186 |
| H | -2.94676 | 2.52122  | -3.26210 |
| H | -0.98595 | 3.13190  | 0.53048  |
| H | -2.47431 | 5.05476  | 0.98276  |
| C | -2.61161 | -0.80960 | -5.37171 |
| C | -1.58790 | 0.11950  | -5.55626 |
| C | -0.99889 | 0.74680  | -4.45647 |
| C | -1.42653 | 0.44299  | -3.15461 |
| C | -2.44837 | -0.50462 | -2.97881 |
| C | -3.04247 | -1.11917 | -4.08062 |
| H | -3.06992 | -1.29469 | -6.23092 |
| H | -1.24630 | 0.36072  | -6.56085 |
| H | -0.20595 | 1.47347  | -4.61338 |
| H | -2.77337 | -0.76446 | -1.97312 |
| H | -3.83663 | -1.84764 | -3.93089 |
| C | 0.82064  | 3.37220  | -2.70367 |
| H | -0.11907 | 3.91620  | -2.71883 |
| C | 3.23969  | 2.02416  | -2.63458 |
| H | 4.18225  | 1.49036  | -2.58950 |
| C | 1.98501  | 4.02112  | -3.11038 |
| H | 1.93954  | 5.05368  | -3.44996 |
| C | 3.20045  | 3.34231  | -3.07084 |
| C | 2.32020  | 3.53826  | 3.01926  |
| H | 1.75785  | 4.47165  | 3.17763  |
| H | 3.33791  | 3.82241  | 2.70465  |
| C | 2.40692  | 2.72257  | 4.32306  |
| H | 1.39212  | 2.41907  | 4.63056  |
| H | 2.82909  | 3.33049  | 5.13815  |
| H | 4.11916  | 3.83984  | -3.37377 |

**Re-6**

|    | A          | B            | C            |
|----|------------|--------------|--------------|
|    | -1275193.8 | -1274967.457 | -1275269.017 |
| Ni | -0.50344   | 0.06302      | 0.57958      |
| C  | -0.69528   | -1.16612     | 2.42351      |
| C  | 0.97536    | 2.43915      | 3.51675      |
| O  | 0.44154    | 1.78262      | 1.30131      |
| P  | -0.57648   | 1.17181      | -1.55162     |
| C  | 1.26549    | 1.78573      | 2.36054      |
| C  | -0.72624   | -1.99983     | 1.29287      |
| C  | -1.68792   | -1.77399     | 0.27972      |
| N  | 1.17725    | -1.32731     | -2.07617     |
| C  | 2.59875    | 1.08894      | 2.13922      |
| C  | -0.36468   | 3.08611      | 3.74635      |
| C  | 1.98938    | 2.59972      | 4.63221      |
| H  | -1.60382   | -2.29784     | -0.66622     |
| H  | 0.14985    | -1.18915     | 3.10300      |
| H  | -2.68548   | -1.43239     | 0.55007      |
| H  | -1.61029   | -0.72556     | 2.81306      |
| H  | 0.13949    | -2.62208     | 1.07355      |
| H  | 2.39857    | 0.10685      | 1.68689      |
| H  | 3.16207    | 1.65056      | 1.37842      |
| H  | -0.75505   | 2.84786      | 4.74713      |
| H  | -0.30733   | 4.18529      | 3.69624      |
| H  | -1.09493   | 2.75668      | 3.00324      |
| H  | 1.69603    | 1.98327      | 5.50074      |

|   |          |          |          |
|---|----------|----------|----------|
| H | 1.96240  | 3.63702  | 5.00209  |
| C | 1.61866  | -2.72081 | -1.89824 |
| C | 3.13229  | -2.58957 | -1.55824 |
| O | 3.38997  | -1.16965 | -1.61455 |
| C | 2.19711  | -0.57325 | -1.91953 |
| H | 3.79394  | -3.08148 | -2.27706 |
| C | 1.11841  | 1.74257  | -2.05628 |
| C | 2.25619  | 0.89273  | -2.09123 |
| H | 3.38146  | -2.94077 | -0.55280 |
| C | 1.27645  | -3.61098 | -3.13163 |
| C | 1.79545  | -5.03872 | -2.87084 |
| H | 2.88737  | -5.07654 | -2.78437 |
| H | 1.37046  | -5.45416 | -1.94912 |
| H | 1.51240  | -5.70323 | -3.69431 |
| C | 1.90595  | -3.04459 | -4.41814 |
| H | 2.99936  | -2.99140 | -4.35939 |
| H | 1.65772  | -3.68329 | -5.27307 |
| H | 1.52691  | -2.03997 | -4.62611 |
| C | -0.25477 | -3.65552 | -3.29672 |
| H | -0.53056 | -4.28307 | -4.15214 |
| H | -0.73478 | -4.08247 | -2.40716 |
| H | -0.66361 | -2.65568 | -3.45794 |
| H | 1.07625  | -3.14861 | -1.04388 |
| C | -3.07686 | 5.09881  | -1.21805 |
| C | -3.09770 | 4.37341  | -2.40995 |
| C | -2.34919 | 3.20152  | -2.53439 |
| C | -1.56884 | 2.73796  | -1.46218 |
| C | -1.55131 | 3.47275  | -0.26328 |
| C | -2.29983 | 4.64541  | -0.15029 |
| H | -3.66166 | 6.00996  | -1.12309 |
| H | -3.69822 | 4.71698  | -3.24839 |
| H | -2.37900 | 2.65177  | -3.46909 |
| H | -0.93471 | 3.12332  | 0.56301  |
| H | -2.27456 | 5.20442  | 0.78144  |
| C | -2.55170 | -0.70378 | -5.31752 |
| C | -1.32902 | -0.04281 | -5.44356 |
| C | -0.70459 | 0.50117  | -4.32005 |
| C | -1.29368 | 0.38390  | -3.05410 |
| C | -2.52010 | -0.28469 | -2.93568 |
| C | -3.14640 | -0.82290 | -4.06015 |
| H | -3.03818 | -1.12382 | -6.19350 |
| H | -0.86032 | 0.05518  | -6.41914 |
| H | 0.24268  | 1.01944  | -4.43100 |
| H | -2.98999 | -0.37900 | -1.96065 |
| H | -4.09867 | -1.33525 | -3.95320 |
| C | 1.31166  | 3.10900  | -2.30234 |
| H | 0.46179  | 3.77970  | -2.27104 |
| C | 3.52249  | 1.44364  | -2.34407 |
| H | 4.38058  | 0.78200  | -2.35511 |
| C | 2.57363  | 3.63807  | -2.57118 |
| H | 2.67946  | 4.70318  | -2.75816 |
| C | 3.68632  | 2.80398  | -2.58453 |
| C | 3.43601  | 0.93625  | 3.41616  |
| H | 4.46229  | 0.63698  | 3.16687  |
| H | 3.01739  | 0.13290  | 4.04000  |
| C | 3.42289  | 2.24389  | 4.21445  |
| H | 3.82983  | 3.04871  | 3.58614  |
| H | 4.07122  | 2.17277  | 5.09726  |
| H | 4.67674  | 3.20469  | -2.78004 |

Si-6

A

B

C

|    | -1275193.4 | -1274966.865 | -1275268.219 |
|----|------------|--------------|--------------|
| Pd | -0.32293   | -0.03096     | 0.55703      |
| C  | -0.45739   | -1.30003     | 2.38321      |
| C  | 2.67862    | 1.37969      | 2.71788      |
| O  | 0.87429    | 1.56785      | 1.18195      |
| P  | -0.54161   | 1.14470      | -1.53747     |
| C  | 1.37722    | 1.64491      | 2.42614      |
| C  | -0.57963   | -2.09557     | 1.23135      |
| C  | -1.59972   | -1.81688     | 0.29178      |
| N  | 1.25665    | -1.24940     | -2.16643     |
| C  | 0.39913    | 2.12709      | 3.48923      |
| C  | 3.65269    | 0.94735      | 1.65596      |
| C  | 3.24886    | 1.55402      | 4.11138      |
| H  | -1.59276   | -2.31695     | -0.67048     |
| H  | 0.43272    | -1.35884     | 3.00070      |
| H  | -2.56655   | -1.45558     | 0.63680      |
| H  | -1.33880   | -0.86254     | 2.84598      |
| H  | 0.25248    | -2.73336     | 0.93974      |
| H  | -0.21548   | 2.92237      | 3.04743      |
| H  | -0.30245   | 1.31142      | 3.72633      |
| H  | 4.49569    | 1.65142      | 1.57420      |
| H  | 4.09829    | -0.03315     | 1.88677      |
| H  | 3.16705    | 0.88774      | 0.68109      |
| H  | 3.89340    | 2.45075      | 4.14145      |
| H  | 3.92515    | 0.71477      | 4.33676      |
| C  | 1.75475    | -2.62502     | -1.99947     |
| C  | 3.26998    | -2.43396     | -1.69569     |
| O  | 3.48680    | -1.01277     | -1.83959     |
| C  | 2.26010    | -0.46193     | -2.08121     |
| H  | 3.93607    | -2.94928     | -2.39303     |
| C  | 1.08311    | 1.79768      | -2.16415     |
| C  | 2.25223    | 1.00065      | -2.27647     |
| H  | 3.54086    | -2.71541     | -0.67363     |
| C  | 1.41506    | -3.52231     | -3.22864     |
| C  | 1.97399    | -4.93682     | -2.97926     |
| H  | 3.06749    | -4.94688     | -2.90705     |
| H  | 1.57237    | -5.36489     | -2.05296     |
| H  | 1.69730    | -5.60656     | -3.80055     |
| C  | 2.00947    | -2.93815     | -4.52367     |
| H  | 3.10185    | -2.85829     | -4.48172     |
| H  | 1.76304    | -3.58032     | -5.37624     |
| H  | 1.60313    | -1.94238     | -4.72310     |
| C  | -0.11716   | -3.60476     | -3.36860     |
| H  | -0.39110   | -4.24273     | -4.21682     |
| H  | -0.57213   | -4.03883     | -2.46946     |
| H  | -0.55291   | -2.61557     | -3.52631     |
| H  | 1.25092    | -3.07441     | -1.13338     |
| C  | -3.06457   | 4.98635      | -0.74617     |
| C  | -3.25424   | 4.28376      | -1.93641     |
| C  | -2.50322   | 3.13730      | -2.20600     |
| C  | -1.55377   | 2.67700      | -1.28052     |
| C  | -1.36693   | 3.38858      | -0.08237     |
| C  | -2.11648   | 4.53643      | 0.17561      |
| H  | -3.65116   | 5.87740      | -0.53876     |
| H  | -3.98855   | 4.62601      | -2.66115     |
| H  | -2.66305   | 2.60509      | -3.13783     |
| H  | -0.62307   | 3.03155      | 0.62774      |
| H  | -1.96022   | 5.07903      | 1.10438      |
| C  | -2.75572   | -0.68486     | -5.20153     |
| C  | -1.55925   | 0.00688      | -5.39718     |
| C  | -0.86941   | 0.54533      | -4.30886     |
| C  | -1.36468   | 0.39274      | -3.00659     |

|   |          |          |          |
|---|----------|----------|----------|
| C | -2.56713 | -0.30475 | -2.81855 |
| C | -3.25881 | -0.83686 | -3.90754 |
| H | -3.29225 | -1.10116 | -6.04954 |
| H | -1.16018 | 0.13293  | -6.40020 |
| H | 0.05697  | 1.08582  | -4.47590 |
| H | -2.96716 | -0.42727 | -1.81601 |
| H | -4.19059 | -1.37146 | -3.74342 |
| C | 1.19645  | 3.16783  | -2.43885 |
| H | 0.32228  | 3.80207  | -2.35256 |
| C | 3.47224  | 1.60053  | -2.62697 |
| H | 4.35532  | 0.97540  | -2.69040 |
| C | 2.41116  | 3.74690  | -2.80680 |
| H | 2.45451  | 4.81298  | -3.01269 |
| C | 3.55812  | 2.96351  | -2.89372 |
| C | 1.07399  | 2.62824  | 4.77325  |
| H | 0.33047  | 2.76037  | 5.56986  |
| H | 1.51566  | 3.61790  | 4.58977  |
| C | 2.18070  | 1.66323  | 5.20738  |
| H | 1.74166  | 0.67239  | 5.39292  |
| H | 2.63486  | 1.98818  | 6.15220  |
| H | 4.51236  | 3.40560  | -3.16462 |

**Re-INT-2**

|    | A            | B            | C           |
|----|--------------|--------------|-------------|
|    | -1275177.313 | -1274950.159 | -1275254.49 |
| Pd | 0.00000      | 0.00000      | 0.00000     |
| O  | 0.00000      | 0.00000      | 2.31838     |
| C  | 2.62959      | 0.00000      | 0.59530     |
| C  | 1.03815      | 1.82617      | 0.10674     |
| C  | 2.17871      | 1.00143      | -0.22364    |
| C  | -0.08994     | 0.99824      | 3.18302     |
| C  | -1.04724     | 1.97549      | 3.18637     |
| N  | -1.60259     | 0.50400      | -1.50745    |
| P  | -1.01013     | -2.15887     | -0.07798    |
| C  | 1.01574      | 0.98580      | 4.24060     |
| C  | -2.18347     | 1.96981      | 2.20066     |
| C  | -1.07153     | 3.09889      | 4.20250     |
| H  | 3.39409      | -0.69218     | 0.25294     |
| H  | 0.75491      | 2.58363      | -0.62338    |
| H  | 2.25764      | -0.10205     | 1.61002     |
| H  | 0.86448      | 2.11992      | 1.14069     |
| H  | 2.58321      | 1.06710      | -1.23339    |
| C  | 0.73275      | 1.87709      | 5.45559     |
| C  | 0.23392      | 3.24869      | 4.99405     |
| C  | -1.50693     | 1.55094      | -2.55608    |
| C  | -2.96144     | 2.06667      | -2.63053    |
| O  | -3.73378     | 1.01422      | -2.00940    |
| C  | -2.85374     | 0.24743      | -1.31244    |
| C  | -2.81951     | -1.84722     | 0.18248     |
| C  | -3.49197     | -0.74902     | -0.42128    |
| C  | -0.92495     | 1.02851      | -3.90933    |
| C  | -0.87060     | 2.21555      | -4.89459    |
| C  | -1.79073     | -0.10128     | -4.49879    |
| C  | 0.50983      | 0.51222      | -3.69270    |
| C  | 0.22511      | -5.38191     | 3.01987     |
| C  | -0.27746     | -5.79195     | 1.78368     |
| C  | -0.66908     | -4.84347     | 0.83936     |
| C  | -0.55968     | -3.47333     | 1.12887     |
| C  | -0.04591     | -3.06133     | 2.37003     |
| C  | 0.33771      | -4.02129     | 3.30835     |
| C  | -0.71760     | -4.46029     | -4.11111    |
| C  | -1.96978     | -4.29210     | -3.52016    |

|   |          |          |          |
|---|----------|----------|----------|
| C | -2.09100 | -3.59625 | -2.31467 |
| C | -0.95863 | -3.05305 | -1.69033 |
| C | 0.29611  | -3.22028 | -2.29908 |
| C | 0.41632  | -3.92426 | -3.49607 |
| C | -3.55008 | -2.68868 | 1.02911  |
| C | -4.86321 | -0.56439 | -0.16946 |
| C | -4.90751 | -2.48134 | 1.27921  |
| C | -5.56929 | -1.41817 | 0.67292  |
| H | 1.63130  | 1.97248  | 6.07944  |
| H | -0.03752 | 1.40758  | 6.08376  |
| H | 0.99975  | 3.71037  | 4.35440  |
| H | 0.08753  | 3.92276  | 5.84803  |
| H | 1.16355  | -0.05673 | 4.55114  |
| H | 1.96205  | 1.29034  | 3.76502  |
| H | -3.15357 | 2.07693  | 2.71146  |
| H | -2.12499 | 2.80563  | 1.48170  |
| H | -2.20261 | 1.03771  | 1.63341  |
| H | -1.90701 | 2.94709  | 4.91087  |
| H | -1.30483 | 4.05055  | 3.69727  |
| H | -3.34932 | 2.20806  | -3.63966 |
| H | -3.11310 | 2.98459  | -2.05221 |
| H | -1.86474 | 2.59864  | -5.15002 |
| H | -0.28411 | 3.04702  | -4.48582 |
| H | -0.39524 | 1.90440  | -5.83070 |
| H | -2.82446 | 0.21607  | -4.67720 |
| H | -1.37939 | -0.42444 | -5.46110 |
| H | -1.81114 | -0.97316 | -3.83943 |
| H | 0.93324  | 0.16827  | -4.64333 |
| H | 1.16077  | 1.30526  | -3.30660 |
| H | 0.53387  | -0.32051 | -2.98622 |
| H | -0.84072 | 2.33788  | -2.19172 |
| H | 0.53314  | -6.12290 | 3.75313  |
| H | -0.36106 | -6.85044 | 1.55138  |
| H | -1.05071 | -5.17181 | -0.12248 |
| H | 0.05247  | -1.99457 | 2.58373  |
| H | 0.73464  | -3.69986 | 4.26758  |
| H | -0.62513 | -5.00395 | -5.04730 |
| H | -2.85621 | -4.70633 | -3.99340 |
| H | -3.06972 | -3.48306 | -1.85829 |
| H | 1.17985  | -2.79455 | -1.83002 |
| H | 1.39460  | -4.04935 | -3.95222 |
| H | -3.04638 | -3.52225 | 1.50580  |
| H | -5.36973 | 0.27142  | -0.63613 |
| H | -5.43921 | -3.15349 | 1.94695  |
| H | -6.62493 | -1.24410 | 0.85782  |

### Si-INT-2

|    | A            | B        | C            |
|----|--------------|----------|--------------|
|    | -1275177.986 | ---      | -1275254.881 |
| Pd | 0.00000      | 0.00000  | 0.00000      |
| O  | 0.00000      | 0.00000  | 2.31213      |
| C  | 2.58595      | 0.00000  | 0.56106      |
| C  | 1.00188      | 1.84982  | 0.20379      |
| C  | 2.12413      | 1.03984  | -0.20641     |
| C  | -0.70854     | 0.84861  | 3.04414      |
| C  | -0.19291     | 1.54636  | 4.10270      |
| N  | -1.61592     | 0.49888  | -1.53962     |
| P  | -0.91747     | -2.18516 | -0.19039     |
| C  | -2.18295     | 0.96633  | 2.67140      |
| C  | 1.26294      | 1.45922  | 4.47430      |
| C  | -1.05494     | 2.38713  | 5.02393      |
| H  | 3.32792      | -0.69132 | 0.17161      |



|   |          |          |          |
|---|----------|----------|----------|
| H | 0.68890  | 2.64674  | -0.46951 |
| H | 2.25653  | -0.11896 | 1.58864  |
| H | 0.86753  | 2.06592  | 1.26069  |
| H | 2.49627  | 1.14477  | -1.22492 |
| C | -2.92536 | 2.11328  | 3.36844  |
| C | -2.56117 | 2.14397  | 4.85527  |
| C | -1.55399 | 1.62267  | -2.50846 |
| C | -3.02243 | 2.09972  | -2.54556 |
| O | -3.76201 | 0.97607  | -2.01772 |
| C | -2.85834 | 0.18613  | -1.37540 |
| C | -2.75119 | -1.98566 | 0.00273  |
| C | -3.46556 | -0.89695 | -0.56966 |
| C | -0.96300 | 1.21450  | -3.89676 |
| C | -0.93457 | 2.47208  | -4.79137 |
| C | -1.80544 | 0.11344  | -4.56903 |
| C | 0.48135  | 0.71135  | -3.71671 |
| C | 0.31942  | -5.40770 | 2.91421  |
| C | -0.06439 | -5.81527 | 1.63470  |
| C | -0.44914 | -4.86949 | 0.68401  |
| C | -0.45281 | -3.50304 | 1.00947  |
| C | -0.05637 | -3.09222 | 2.29406  |
| C | 0.32186  | -4.04954 | 3.23780  |
| C | -0.37429 | -4.33399 | -4.28306 |
| C | -1.65152 | -4.24722 | -3.72957 |
| C | -1.84534 | -3.60219 | -2.50568 |
| C | -0.76189 | -3.02800 | -1.82433 |
| C | 0.51827  | -3.11228 | -2.39591 |
| C | 0.71125  | -3.76650 | -3.61174 |
| C | -3.46319 | -2.91838 | 0.76664  |
| C | -4.85442 | -0.80960 | -0.36674 |
| C | -4.84002 | -2.81003 | 0.96548  |
| C | -5.53932 | -1.75321 | 0.39201  |
| H | -4.00985 | 2.00895  | 3.22828  |
| H | -2.64008 | 3.07178  | 2.91051  |
| H | -2.82965 | 1.17879  | 5.30846  |
| H | -3.13539 | 2.91415  | 5.38679  |
| H | -2.23544 | 1.07900  | 1.57927  |
| H | -2.67580 | 0.00678  | 2.89358  |
| H | 1.70792  | 2.45751  | 4.60570  |
| H | 1.41252  | 0.93255  | 5.43094  |
| H | 1.83247  | 0.92587  | 3.71083  |
| H | -0.84154 | 3.46100  | 4.87034  |
| H | -0.76876 | 2.19240  | 6.07036  |
| H | -3.41315 | 2.31422  | -3.54061 |
| H | -3.20238 | 2.96152  | -1.89324 |
| H | -1.93676 | 2.85428  | -5.01469 |
| H | -0.36241 | 3.28190  | -4.32335 |
| H | -0.45745 | 2.24093  | -5.74947 |
| H | -2.84549 | 0.42106  | -4.72509 |
| H | -1.38764 | -0.12876 | -5.55205 |
| H | -1.80704 | -0.80538 | -3.97591 |
| H | 0.91239  | 0.44780  | -4.68934 |
| H | 1.11607  | 1.48583  | -3.27090 |
| H | 0.52021  | -0.17123 | -3.07429 |
| H | -0.90817 | 2.39937  | -2.08945 |
| H | 0.62093  | -6.14641 | 3.65215  |
| H | -0.06203 | -6.87035 | 1.37323  |
| H | -0.74006 | -5.19680 | -0.30973 |
| H | -0.03708 | -2.02699 | 2.53525  |
| H | 0.62761  | -3.72667 | 4.22939  |
| H | -0.22495 | -4.83772 | -5.23416 |
| H | -2.50116 | -4.68518 | -4.24680 |

|   |          |          |          |
|---|----------|----------|----------|
| H | -2.84293 | -3.55249 | -2.08028 |
| H | 1.36391  | -2.65980 | -1.88384 |
| H | 1.70846  | -3.82753 | -4.03899 |
| H | -2.92913 | -3.74696 | 1.21795  |
| H | -5.39344 | 0.02014  | -0.80664 |
| H | -5.35699 | -3.55281 | 1.56676  |
| H | -6.61091 | -1.65416 | 0.53774  |

**Re-7**

|    | A            | B           | C            |
|----|--------------|-------------|--------------|
|    | -1275187.684 | -1274959.15 | -1275263.393 |
| Pd | -0.72194     | 0.22606     | 0.45845      |
| O  | 0.39954      | -0.05593    | 2.15160      |
| C  | 1.42802      | 3.44554     | 1.01799      |
| C  | -0.78594     | 2.28500     | 0.83918      |
| C  | 0.39502      | 2.98012     | 0.29732      |
| C  | 0.14795      | 0.47898     | 3.35494      |
| C  | 1.14314      | 0.98986     | 4.13011      |
| N  | -1.92839     | 0.43007     | -1.31722     |
| P  | -1.19772     | -2.21905    | 0.08000      |
| C  | -1.28339     | 0.35598     | 3.85949      |
| C  | 2.56183      | 1.08793     | 3.63350      |
| C  | 0.90775      | 1.42423     | 5.56343      |
| H  | 2.27596      | 3.93627     | 0.54836      |
| H  | -1.72460     | 2.61294     | 0.37768      |
| H  | 1.45519      | 3.33275     | 2.09775      |
| H  | -0.84552     | 2.36776     | 1.92523      |
| H  | 0.42457      | 3.12836     | -0.78440     |
| C  | -1.56042     | 1.16942     | 5.13011      |
| C  | -0.43361     | 0.95693     | 6.14556      |
| C  | -1.75000     | 1.41419     | -2.41655     |
| C  | -3.20653     | 1.62093     | -2.89022     |
| O  | -3.91571     | 0.47217     | -2.35868     |
| C  | -3.12073     | -0.06009    | -1.40044     |
| C  | -3.05239     | -2.09727    | 0.16022      |
| C  | -3.76152     | -1.09332    | -0.55636     |
| C  | -0.75492     | 0.95704     | -3.53179     |
| C  | -0.61409     | 2.12267     | -4.53435     |
| C  | -1.25735     | -0.30062    | -4.26576     |
| C  | 0.62776      | 0.66989     | -2.91647     |
| C  | 0.11019      | -5.45614    | 3.13789      |
| C  | -0.57434     | -5.85499    | 1.98640      |
| C  | -0.99032     | -4.90384    | 1.05736      |
| C  | -0.73459     | -3.53912    | 1.27952      |
| C  | -0.03185     | -3.14460    | 2.42789      |
| C  | 0.38333      | -4.10627    | 3.35280      |
| C  | -0.29877     | -4.48063    | -3.89001     |
| C  | -1.62202     | -4.37906    | -3.46169     |
| C  | -1.93016     | -3.69191    | -2.28507     |
| C  | -0.91514     | -3.09235    | -1.52553     |
| C  | 0.41332      | -3.19168    | -1.97192     |
| C  | 0.71902      | -3.88553    | -3.14115     |
| C  | -3.78791     | -2.96710    | 0.97279      |
| C  | -5.16130     | -1.03378    | -0.46531     |
| C  | -5.17766     | -2.87740    | 1.07602      |
| C  | -5.86890     | -1.91490    | 0.34768      |
| H  | -2.53284     | 0.89092     | 5.55663      |
| H  | -1.62115     | 2.23770     | 4.87748      |
| H  | -0.37295     | -0.11316    | 6.39083      |
| H  | -0.64521     | 1.48413     | 7.08476      |
| H  | -1.96171     | 0.65496     | 3.04900      |
| H  | -1.49611     | -0.70976    | 4.04151      |

|   |          |          |          |
|---|----------|----------|----------|
| H | 2.99333  | 2.07743  | 3.84612  |
| H | 3.21598  | 0.35641  | 4.13406  |
| H | 2.61235  | 0.90783  | 2.55842  |
| H | 0.97309  | 2.52462  | 5.63186  |
| H | 1.73070  | 1.05525  | 6.19557  |
| H | -3.34223 | 1.61930  | -3.97159 |
| H | -3.66542 | 2.52163  | -2.46853 |
| H | -1.55773 | 2.36128  | -5.03841 |
| H | -0.25633 | 3.03355  | -4.04050 |
| H | 0.11032  | 1.86188  | -5.31271 |
| H | -2.22238 | -0.14088 | -4.75972 |
| H | -0.54141 | -0.58749 | -5.04303 |
| H | -1.35840 | -1.14982 | -3.58586 |
| H | 1.33633  | 0.39501  | -3.70590 |
| H | 1.02833  | 1.54621  | -2.39726 |
| H | 0.58561  | -0.15120 | -2.19709 |
| H | -1.35600 | 2.33486  | -1.97924 |
| H | 0.43860  | -6.20088 | 3.85827  |
| H | -0.77587 | -6.90819 | 1.80876  |
| H | -1.50350 | -5.22391 | 0.15497  |
| H | 0.20499  | -2.09093 | 2.56505  |
| H | 0.93104  | -3.79413 | 4.23771  |
| H | -0.06074 | -5.01917 | -4.80308 |
| H | -2.41895 | -4.84017 | -4.03904 |
| H | -2.96363 | -3.63089 | -1.95808 |
| H | 1.21100  | -2.72808 | -1.39674 |
| H | 1.75205  | -3.95880 | -3.46963 |
| H | -3.26600 | -3.73093 | 1.53781  |
| H | -5.68915 | -0.27470 | -1.03085 |
| H | -5.71287 | -3.56674 | 1.72335  |
| H | -6.95021 | -1.84067 | 0.41435  |

Si-7

|    | A            | B           | C            |
|----|--------------|-------------|--------------|
|    | -1275189.407 | -1274961.01 | -1275266.081 |
| Pd | -1.18906     | 0.38971     | 0.66211      |
| O  | -0.46099     | 0.27490     | 2.58217      |
| C  | 0.35943      | 3.86990     | 1.65663      |
| C  | -1.58701     | 2.41705     | 1.02968      |
| C  | -0.44609     | 3.29745     | 0.74302      |
| C  | 0.76894      | 0.69419     | 2.89635      |
| C  | 1.02277      | 1.37858     | 4.04693      |
| N  | -2.12459     | 0.45339     | -1.27792     |
| P  | -1.33637     | -2.08771    | 0.29769      |
| C  | 1.87924      | 0.30934     | 1.92826      |
| C  | -0.07782     | 1.72597     | 5.01368      |
| C  | 2.42872      | 1.75850     | 4.46445      |
| H  | 1.19811      | 4.49523     | 1.36131      |
| H  | -2.45781     | 2.61683     | 0.39512      |
| H  | 0.20479      | 3.72100     | 2.72008      |
| H  | -1.86566     | 2.40983     | 2.08486      |
| H  | -0.23777     | 3.49812     | -0.31078     |
| C  | 3.29017      | 0.40850     | 2.52541      |
| C  | 3.44535      | 1.71095     | 3.31623      |
| C  | -1.87036     | 1.47116     | -2.33036     |
| C  | -3.22811     | 1.50445     | -3.06631     |
| O  | -3.86709     | 0.26192     | -2.67852     |
| C  | -3.20300     | -0.18825    | -1.58599     |
| C  | -3.15888     | -2.24205    | -0.04677     |
| C  | -3.84345     | -1.33041    | -0.89702     |
| C  | -0.63829     | 1.15352     | -3.23930     |
| C  | -0.47070     | 2.33041     | -4.22451     |

|   |          |          |          |
|---|----------|----------|----------|
| C | -0.83098 | -0.15843 | -4.02337 |
| C | 0.63599  | 1.05098  | -2.38027 |
| C | -0.51278 | -4.96494 | 3.84414  |
| C | -0.56271 | -5.48823 | 2.54987  |
| C | -0.81335 | -4.64815 | 1.46611  |
| C | -1.02014 | -3.27294 | 1.67008  |
| C | -0.95216 | -2.74767 | 2.97146  |
| C | -0.70542 | -3.59913 | 4.05047  |
| C | 0.76331  | -4.21981 | -3.26882 |
| C | -0.62016 | -4.33798 | -3.13767 |
| C | -1.28396 | -3.70604 | -2.08344 |
| C | -0.56875 | -2.94140 | -1.15000 |
| C | 0.82349  | -2.82014 | -1.29814 |
| C | 1.48424  | -3.46004 | -2.34506 |
| C | -3.90654 | -3.25593 | 0.56455  |
| C | -5.22147 | -1.49254 | -1.12185 |
| C | -5.27951 | -3.39166 | 0.34818  |
| C | -5.94083 | -2.51139 | -0.50340 |
| H | 4.04551  | 0.33754  | 1.73154  |
| H | 3.46219  | -0.44291 | 3.19904  |
| H | 3.27285  | 2.56156  | 2.64301  |
| H | 4.46648  | 1.81231  | 3.70577  |
| H | 1.68169  | -0.71571 | 1.58723  |
| H | 1.79707  | 0.95186  | 1.03844  |
| H | 0.04246  | 1.19959  | 5.97361  |
| H | -0.07886 | 2.79971  | 5.25526  |
| H | -1.05346 | 1.45775  | 4.60361  |
| H | 2.77210  | 1.10107  | 5.28328  |
| H | 2.41390  | 2.76827  | 4.90234  |
| H | -3.16112 | 1.51373  | -4.15420 |
| H | -3.86899 | 2.32897  | -2.73532 |
| H | -1.32589 | 2.43975  | -4.90118 |
| H | -0.33777 | 3.27975  | -3.69284 |
| H | 0.41564  | 2.17370  | -4.84803 |
| H | -1.70853 | -0.13042 | -4.67914 |
| H | 0.04144  | -0.34283 | -4.65928 |
| H | -0.93307 | -1.01572 | -3.35287 |
| H | 1.50609  | 0.87682  | -3.02350 |
| H | 0.81589  | 1.97108  | -1.81531 |
| H | 0.57275  | 0.22871  | -1.66369 |
| H | -1.67856 | 2.42605  | -1.83466 |
| H | -0.31301 | -5.62152 | 4.68701  |
| H | -0.40182 | -6.55022 | 2.38362  |
| H | -0.84135 | -5.06178 | 0.46228  |
| H | -1.04503 | -1.67420 | 3.12161  |
| H | -0.64829 | -3.18602 | 5.05363  |
| H | 1.27781  | -4.71487 | -4.08778 |
| H | -1.18697 | -4.92819 | -3.85284 |
| H | -2.35973 | -3.81663 | -1.98677 |
| H | 1.39046  | -2.22314 | -0.58818 |
| H | 2.56191  | -3.36139 | -2.44221 |
| H | -3.40551 | -3.95676 | 1.22309  |
| H | -5.72611 | -0.79866 | -1.78383 |
| H | -5.82371 | -4.19058 | 0.84462  |
| H | -7.00711 | -2.60933 | -0.68358 |

**Re-INT-3**

|    | A            | B            | C            |
|----|--------------|--------------|--------------|
|    | -1275183.336 | -1274958.003 | -1275264.986 |
| Pd | 0.02029      | -0.01478     | -0.00635     |

|   |          |          |          |
|---|----------|----------|----------|
| C | 0.00480  | -0.01128 | 2.07554  |
| C | 1.43854  | 0.00281  | 1.88449  |
| C | -0.98490 | 3.07281  | -0.68047 |
| C | -2.32371 | 3.08126  | -0.99374 |
| O | -0.43733 | 2.33296  | 0.25366  |
| C | 2.04561  | 1.05355  | 1.24660  |
| P | -1.56548 | -1.60007 | -0.48618 |
| N | 0.27357  | 0.16522  | -2.17691 |
| C | -0.01674 | 4.00706  | -1.41191 |
| C | -3.30377 | 2.31949  | -0.14723 |
| C | -2.90821 | 3.90344  | -2.11938 |
| H | -0.43322 | -0.87058 | 2.57796  |
| H | 3.08908  | 0.98747  | 0.95016  |
| H | -0.48965 | 0.94132  | 2.26126  |
| H | 1.50390  | 1.98107  | 1.06853  |
| H | 2.00229  | -0.90986 | 2.07541  |
| C | -0.69725 | 5.09017  | -2.25990 |
| C | -1.84974 | 4.48414  | -3.06712 |
| C | 1.52614  | 0.58305  | -2.85114 |
| C | 0.99067  | 1.30657  | -4.10952 |
| O | -0.39380 | 0.89379  | -4.19273 |
| C | -0.71056 | 0.33229  | -2.99867 |
| C | -2.62667 | -0.93311 | -1.85143 |
| C | -2.12458 | -0.06640 | -2.86158 |
| C | 2.49773  | -0.60547 | -3.14246 |
| C | 3.75317  | -0.03586 | -3.83608 |
| C | 1.83484  | -1.66716 | -4.04088 |
| C | 2.93029  | -1.26134 | -1.81809 |
| C | -4.57261 | -2.77189 | 2.86018  |
| C | -4.05155 | -3.76795 | 2.03533  |
| C | -3.15487 | -3.44041 | 1.01633  |
| C | -2.76589 | -2.10722 | 0.81659  |
| C | -3.28815 | -1.11093 | 1.65864  |
| C | -4.19080 | -1.44242 | 2.66703  |
| C | 0.01487  | -5.69880 | -2.02099 |
| C | -1.04138 | -5.08408 | -2.69347 |
| C | -1.52917 | -3.84971 | -2.25892 |
| C | -0.95680 | -3.21219 | -1.14820 |
| C | 0.11529  | -3.83280 | -0.48679 |
| C | 0.59176  | -5.07094 | -0.91463 |
| C | -3.98217 | -1.29119 | -1.89067 |
| C | -3.00603 | 0.40206  | -3.85413 |
| C | -4.83877 | -0.82048 | -2.88436 |
| C | -4.34685 | 0.03692  | -3.86652 |
| H | 0.03127  | 5.58368  | -2.91773 |
| H | -1.09929 | 5.87119  | -1.59937 |
| H | -1.45657 | 3.68299  | -3.71056 |
| H | -2.30021 | 5.23189  | -3.73315 |
| H | 0.62916  | 4.45967  | -0.64799 |
| H | 0.65748  | 3.40210  | -2.03886 |
| H | -4.18025 | 2.93816  | 0.10274  |
| H | -3.69981 | 1.41608  | -0.63966 |
| H | -2.82327 | 2.01347  | 0.78636  |
| H | -3.52400 | 4.72943  | -1.71581 |
| H | -3.61783 | 3.28703  | -2.69942 |
| H | 1.47397  | 1.01636  | -5.04325 |
| H | 1.01266  | 2.39546  | -4.01178 |
| H | 3.53287  | 0.39812  | -4.81753 |
| H | 4.22697  | 0.74064  | -3.22404 |
| H | 4.49042  | -0.83037 | -3.99245 |
| H | 1.51457  | -1.25715 | -5.00531 |
| H | 2.54269  | -2.47623 | -4.25085 |

|   |          |          |          |
|---|----------|----------|----------|
| H | 0.96171  | -2.11010 | -3.55300 |
| H | 3.64214  | -2.07147 | -2.01426 |
| H | 3.41947  | -0.53681 | -1.15782 |
| H | 2.07483  | -1.67929 | -1.28177 |
| H | 2.04519  | 1.28838  | -2.19531 |
| H | -5.27063 | -3.02949 | 3.65206  |
| H | -4.34294 | -4.80472 | 2.18066  |
| H | -2.76093 | -4.22546 | 0.37937  |
| H | -2.99030 | -0.07651 | 1.51759  |
| H | -4.59115 | -0.66058 | 3.30641  |
| H | 0.39129  | -6.65984 | -2.36035 |
| H | -1.49121 | -5.56527 | -3.55779 |
| H | -2.35750 | -3.38597 | -2.78522 |
| H | 0.57791  | -3.33592 | 0.36227  |
| H | 1.41835  | -5.54177 | -0.38971 |
| H | -4.37793 | -1.94699 | -1.12262 |
| H | -2.62042 | 1.06460  | -4.61892 |
| H | -5.88385 | -1.11696 | -2.88130 |
| H | -5.00261 | 0.42279  | -4.64140 |

### Si-INT-3

|    | A            | B            | C            |
|----|--------------|--------------|--------------|
|    | -1275184.325 | -1274959.627 | -1275263.541 |
| Pd | 0.08535      | 0.05117      | 0.00298      |
| C  | 0.09905      | 0.06630      | 2.12076      |
| C  | 1.48942      | 0.13089      | 1.78790      |
| C  | -1.42495     | 3.10808      | -0.53258     |
| C  | -0.91858     | 4.08963      | -1.35444     |
| O  | -0.71681     | 2.36694      | 0.28576      |
| C  | 1.92390      | 1.17983      | 0.98917      |
| P  | -1.60766     | -1.43391     | -0.46327     |
| N  | 0.34103      | 0.27224      | -2.15791     |
| C  | -2.93605     | 2.84339      | -0.50375     |
| C  | 0.53364      | 4.48344      | -1.28550     |
| C  | -1.78586     | 4.94148      | -2.25793     |
| C  | -3.80185     | 3.92088      | -1.17195     |
| C  | -3.18091     | 4.35314      | -2.50240     |
| H  | -3.87082     | 4.79804      | -0.51269     |
| H  | -4.82872     | 3.55665      | -1.31348     |
| H  | -3.82108     | 5.08258      | -3.01670     |
| H  | -3.10060     | 3.47792      | -3.16332     |
| H  | -3.13422     | 1.86433      | -0.96643     |
| H  | -3.21752     | 2.73666      | 0.55278      |
| H  | 1.00273      | 4.56421      | -2.28068     |
| H  | 0.67202      | 5.47331      | -0.81737     |
| H  | 1.10154      | 3.76148      | -0.69358     |
| H  | -1.27976     | 5.09386      | -3.22664     |
| H  | -1.89844     | 5.96206      | -1.84297     |
| H  | -0.27688     | -0.80281     | 2.65380      |
| H  | 2.91978      | 1.16169      | 0.55618      |
| H  | -0.44505     | 0.99777      | 2.26891      |
| H  | 1.32831      | 2.08975      | 0.90922      |
| H  | 2.12774      | -0.73549     | 1.95224      |
| C  | 1.57175      | 0.86070      | -2.74977     |
| C  | 0.98354      | 1.72953      | -3.87576     |
| O  | -0.29666     | 1.10526      | -4.14078     |
| C  | -0.61646     | 0.42027      | -3.01571     |
| H  | 1.54808      | 1.73493      | -4.80830     |
| C  | -2.56658     | -0.87400     | -1.94438     |
| C  | -2.00831     | -0.07455     | -2.97701     |
| H  | 0.78733      | 2.75223      | -3.54253     |
| C  | 2.59684      | -0.22657     | -3.21180     |

|   |          |          |          |
|---|----------|----------|----------|
| C | 3.84790  | 0.49768  | -3.75167 |
| H | 3.63408  | 1.09375  | -4.64553 |
| H | 4.27654  | 1.16768  | -2.99708 |
| H | 4.61848  | -0.23110 | -4.02461 |
| C | 2.00781  | -1.13724 | -4.30758 |
| H | 1.70704  | -0.57747 | -5.19945 |
| H | 2.75379  | -1.87600 | -4.62082 |
| H | 1.13529  | -1.68653 | -3.94042 |
| C | 3.01368  | -1.09656 | -2.01034 |
| H | 3.74932  | -1.84492 | -2.32672 |
| H | 3.47242  | -0.49133 | -1.22082 |
| H | 2.15659  | -1.61890 | -1.57735 |
| H | 2.05160  | 1.48543  | -1.99317 |
| C | -4.85208 | -1.79931 | 2.83354  |
| C | -4.42168 | -2.95571 | 2.18328  |
| C | -3.44895 | -2.87918 | 1.18383  |
| C | -2.89531 | -1.63952 | 0.83356  |
| C | -3.32224 | -0.47933 | 1.50191  |
| C | -4.30117 | -0.56218 | 2.49004  |
| H | -5.61021 | -1.86144 | 3.60967  |
| H | -4.84331 | -3.92101 | 2.45080  |
| H | -3.12341 | -3.78451 | 0.68062  |
| H | -2.87930 | 0.48080  | 1.24951  |
| H | -4.62862 | 0.34112  | 2.99739  |
| C | -0.24286 | -5.78245 | -1.38631 |
| C | -1.26719 | -5.22032 | -2.14821 |
| C | -1.69493 | -3.91491 | -1.89869 |
| C | -1.09560 | -3.15424 | -0.88395 |
| C | -0.05365 | -3.72329 | -0.13408 |
| C | 0.36325  | -5.03079 | -0.37735 |
| H | 0.08735  | -6.79885 | -1.58227 |
| H | -1.73732 | -5.79736 | -2.94002 |
| H | -2.49504 | -3.49179 | -2.49747 |
| H | 0.43530  | -3.12943 | 0.63376  |
| H | 1.16713  | -5.45960 | 0.21465  |
| C | -3.91549 | -1.24700 | -2.04294 |
| H | -4.35990 | -1.83662 | -1.24813 |
| C | -2.82448 | 0.29872  | -4.06207 |
| H | -2.39765 | 0.91528  | -4.84279 |
| C | -4.70710 | -0.86917 | -3.12564 |
| H | -5.74904 | -1.17435 | -3.16554 |
| C | -4.15512 | -0.09424 | -4.14268 |
| H | -4.75818 | 0.21621  | -4.99081 |

**Re-8**

|    | A            | B            | C            |
|----|--------------|--------------|--------------|
|    | -1275184.085 | -1274956.607 | -1275260.646 |
| Pd | -0.02259     | -0.00870     | -0.01304     |
| C  | -0.07424     | -0.04352     | 2.07155      |
| C  | 1.28406      | -0.04577     | 2.64928      |
| C  | 1.74372      | 0.81524      | 3.57264      |
| C  | 2.74014      | -2.58802     | 0.35869      |
| O  | 0.45076      | -2.04464     | -0.07760     |
| C  | 1.39923      | -2.74673     | 0.54783      |
| N  | -0.06303     | -0.09244     | -2.27796     |
| P  | -0.64102     | 2.17299      | -0.30837     |
| C  | 0.84743      | -3.82459     | 1.47432      |
| C  | 3.30085      | -1.56822     | -0.59698     |
| C  | 3.76837      | -3.45722     | 1.05620      |
| H  | -0.69356     | 0.76709      | 2.46605      |
| H  | -0.57998     | -1.00667     | 2.19664      |
| H  | 1.94699      | -0.83490     | 2.29139      |

|   |          |          |          |
|---|----------|----------|----------|
| H | 2.75720  | 0.74520  | 3.95921  |
| H | 1.11621  | 1.60159  | 3.98537  |
| H | 3.92265  | -0.81965 | -0.08148 |
| H | 3.95459  | -2.04118 | -1.34714 |
| H | 2.50609  | -1.03544 | -1.12363 |
| H | 0.47314  | -3.34433 | 2.39213  |
| H | -0.03413 | -4.25816 | 0.98546  |
| H | 4.23196  | -4.14111 | 0.32239  |
| H | 4.59805  | -2.82778 | 1.41517  |
| C | -0.15303 | -1.40611 | -2.96314 |
| C | 0.69470  | -1.16240 | -4.23116 |
| O | 0.81214  | 0.28518  | -4.31023 |
| C | 0.43663  | 0.76201  | -3.09746 |
| C | 0.66553  | 2.21139  | -2.89817 |
| C | 0.25425  | 2.94170  | -1.75085 |
| H | 0.23888  | -1.50370 | -5.16136 |
| H | 1.70702  | -1.57194 | -4.15107 |
| H | 0.30839  | -2.13581 | -2.29259 |
| C | -1.62468 | -1.86057 | -3.22362 |
| C | -1.57258 | -3.25623 | -3.88125 |
| H | -1.07505 | -3.24377 | -4.85819 |
| H | -1.04477 | -3.97350 | -3.24271 |
| H | -2.58750 | -3.63615 | -4.04100 |
| C | -2.37881 | -0.87745 | -4.13928 |
| H | -1.91322 | -0.77915 | -5.12693 |
| H | -3.40554 | -1.22494 | -4.29907 |
| H | -2.43582 | 0.11860  | -3.68872 |
| C | -2.36873 | -1.98241 | -1.87912 |
| H | -3.35279 | -2.44023 | -2.03591 |
| H | -1.80022 | -2.58868 | -1.16808 |
| H | -2.52317 | -1.00043 | -1.42346 |
| C | 0.07215  | 5.27782  | 3.07584  |
| C | -1.18424 | 5.20641  | 2.47336  |
| C | -1.42504 | 4.28429  | 1.45341  |
| C | -0.40815 | 3.41496  | 1.02981  |
| C | 0.84783  | 3.47732  | 1.65593  |
| C | 1.08647  | 4.41058  | 2.66439  |
| H | 0.25751  | 5.99822  | 3.86750  |
| H | -1.98161 | 5.87143  | 2.79359  |
| H | -2.40428 | 4.24578  | 0.98717  |
| H | 1.63119  | 2.78196  | 1.36997  |
| H | 2.06299  | 4.44701  | 3.13889  |
| C | -5.16660 | 2.51787  | -1.31416 |
| C | -4.25878 | 3.32747  | -1.99753 |
| C | -2.89328 | 3.24211  | -1.72085 |
| C | -2.42081 | 2.33580  | -0.76029 |
| C | -3.34120 | 1.51689  | -0.08487 |
| C | -4.70572 | 1.61390  | -0.35574 |
| H | -6.22882 | 2.58664  | -1.53196 |
| H | -4.61227 | 4.02938  | -2.74792 |
| H | -2.19859 | 3.88161  | -2.25642 |
| H | -2.98116 | 0.79589  | 0.64411  |
| H | -5.40639 | 0.97525  | 0.17482  |
| C | 0.53705  | 4.31430  | -1.70759 |
| H | 0.23630  | 4.88962  | -0.83949 |
| C | 1.33002  | 2.88334  | -3.93855 |
| H | 1.63851  | 2.31412  | -4.80673 |
| C | 1.19794  | 4.96600  | -2.74960 |
| H | 1.39683  | 6.03152  | -2.67544 |
| C | 1.59674  | 4.24778  | -3.87202 |
| H | 2.11412  | 4.73928  | -4.69038 |
| C | 3.20267  | -4.27623 | 2.22450  |



|   |         |          |         |
|---|---------|----------|---------|
| H | 3.04310 | -3.61840 | 3.09037 |
| H | 3.92609 | -5.03988 | 2.53751 |
| C | 1.86672 | -4.91378 | 1.83051 |
| H | 1.48140 | -5.55128 | 2.63658 |
| H | 2.02299 | -5.56726 | 0.96022 |

**Si-8**

|    | A            | B            | C            |
|----|--------------|--------------|--------------|
|    | -1275184.085 | -1274956.607 | -1275260.646 |
| Pd | 0.05289      | -0.06571     | -0.05798     |
| C  | 0.12060      | -0.24448     | 2.03440      |
| C  | 1.48547      | -0.18110     | 2.56694      |
| C  | 2.02381      | 0.87491      | 3.20164      |
| C  | 3.59040      | 2.18205      | 0.72037      |
| O  | 1.89867      | 0.89796      | -0.30070     |
| C  | 2.30542      | 2.01485      | 0.28778      |
| N  | -0.14979     | 0.13423      | -2.36423     |
| P  | -1.97782     | -1.11236     | -0.28813     |
| C  | 1.27726      | 3.13298      | 0.39193      |
| C  | 4.58626      | 1.05642      | 0.65513      |
| C  | 4.11759      | 3.51849      | 1.20097      |
| H  | -0.51581     | 0.56663      | 2.40272      |
| H  | -0.35918     | -1.20662     | 2.23397      |
| H  | 2.10635      | -1.06456     | 2.41367      |
| H  | 3.04296      | 0.86043      | 3.57473      |
| H  | 1.44980      | 1.78048      | 3.38321      |
| H  | 5.30900      | 1.19344      | -0.16518     |
| H  | 5.17987      | 0.99635      | 1.57900      |
| H  | 4.08033      | 0.10136      | 0.50018      |
| H  | 1.01998      | 3.46557      | -0.62662     |
| H  | 0.35400      | 2.69961      | 0.80131      |
| H  | 4.31034      | 3.47498      | 2.28715      |
| H  | 5.10385      | 3.70666      | 0.74749      |
| C  | 1.05470      | 0.41855      | -3.18000     |
| C  | 0.50446      | 1.38674      | -4.25288     |
| O  | -0.93897     | 1.26853      | -4.13821     |
| C  | -1.17620     | 0.60356      | -2.97819     |
| C  | -2.60319     | 0.51895      | -2.59181     |
| C  | -3.08813     | -0.19628     | -1.46348     |
| H  | 0.77216      | 1.13263      | -5.27966     |
| H  | 0.76845      | 2.43155      | -4.05930     |
| H  | 1.77006      | 0.91007      | -2.51535     |
| C  | 1.72650      | -0.87734     | -3.73088     |
| C  | 2.97485      | -0.45787     | -4.53556     |
| H  | 2.72499      | 0.14597      | -5.41589     |
| H  | 3.66844      | 0.12043      | -3.91484     |
| H  | 3.50863      | -1.34483     | -4.89384     |
| C  | 0.76789      | -1.68245     | -4.62870     |
| H  | 0.43657      | -1.11277     | -5.50510     |
| H  | 1.26575      | -2.58547     | -4.99906     |
| H  | -0.12061     | -1.99960     | -4.07369     |
| C  | 2.17970      | -1.75188     | -2.54526     |
| H  | 2.76689      | -2.60378     | -2.90847     |
| H  | 2.78960      | -1.17627     | -1.84253     |
| H  | 1.32128      | -2.14408     | -1.99408     |
| C  | -4.51728     | -1.64084     | 3.56987      |
| C  | -4.25153     | -2.75431     | 2.77403      |
| C  | -3.51676     | -2.61764     | 1.59410      |
| C  | -3.03504     | -1.36094     | 1.20039      |
| C  | -3.29943     | -0.24657     | 2.01517      |
| C  | -4.04226     | -0.38478     | 3.18526      |
| H  | -5.08630     | -1.75066     | 4.48898      |

|   |          |          |          |
|---|----------|----------|----------|
| H | -4.61509 | -3.73504 | 3.06904  |
| H | -3.31925 | -3.49250 | 0.98346  |
| H | -2.91811 | 0.73078  | 1.73185  |
| H | -4.23924 | 0.48617  | 3.80408  |
| C | -1.59671 | -5.41750 | -1.99980 |
| C | -2.67354 | -4.62354 | -2.39679 |
| C | -2.80553 | -3.32282 | -1.90823 |
| C | -1.85329 | -2.79892 | -1.02116 |
| C | -0.76725 | -3.60143 | -0.63553 |
| C | -0.64441 | -4.90470 | -1.11734 |
| H | -1.49710 | -6.43010 | -2.38109 |
| H | -3.41543 | -5.01673 | -3.08663 |
| H | -3.65138 | -2.71776 | -2.22000 |
| H | -0.01498 | -3.19513 | 0.03531  |
| H | 0.20054  | -5.51461 | -0.80994 |
| C | -4.47011 | -0.19432 | -1.22414 |
| H | -4.85936 | -0.73132 | -0.36648 |
| C | -3.51630 | 1.19459  | -3.41945 |
| H | -3.13366 | 1.73721  | -4.27513 |
| C | -5.36249 | 0.48169  | -2.05677 |
| H | -6.42619 | 0.45694  | -1.83632 |
| C | -4.88385 | 1.18072  | -3.16069 |
| H | -5.56486 | 1.71445  | -3.81673 |
| C | 3.18138  | 4.69631  | 0.89661  |
| H | 3.24323  | 4.94572  | -0.17206 |
| H | 3.50081  | 5.58971  | 1.44818  |
| C | 1.73451  | 4.32805  | 1.23864  |
| H | 1.06298  | 5.18280  | 1.08549  |
| H | 1.67454  | 4.06816  | 2.30452  |

#### Re-INT4

|    | A            | B            | C            |
|----|--------------|--------------|--------------|
|    | -1275174.727 | -1274949.011 | -1275255.984 |
| Pd | 0.00000      | 0.00000      | 0.00000      |
| O  | 0.00000      | 0.00000      | 2.56617      |
| C  | 2.23258      | 0.00000      | 1.68232      |
| C  | -1.73080     | 3.26479      | 0.21685      |
| P  | -0.55409     | -0.59314     | -2.13430     |
| N  | -0.64698     | -2.17231     | 0.42667      |
| C  | 0.33222      | 2.00290      | -0.43906     |
| C  | -0.97089     | 2.63984      | -0.70014     |
| C  | 1.15191      | 0.56461      | 2.37736      |
| C  | 1.30411      | 1.94848      | 3.02263      |
| C  | 2.38305      | -1.50015     | 1.54935      |
| C  | 3.52934      | 0.75874      | 1.45676      |
| C  | 2.74275      | 2.47328      | 3.11178      |
| C  | 3.46707      | 2.25816      | 1.77948      |
| H  | 3.28362      | 1.93226      | 3.90130      |
| H  | 2.74842      | 3.53252      | 3.39976      |
| H  | 4.48193      | 2.67519      | 1.81249      |
| H  | 2.93559      | 2.79760      | 0.98377      |
| H  | 0.66783      | 2.66915      | 2.48793      |
| H  | 0.85083      | 1.85301      | 4.01710      |
| H  | 2.55045      | -1.84884     | 0.52000      |
| H  | 3.26029      | -1.83872     | 2.12857      |
| H  | 1.50756      | -2.01533     | 1.94624      |
| H  | 3.87753      | 0.61768      | 0.42021      |
| H  | 4.32326      | 0.30300      | 2.07959      |
| H  | 1.02155      | 2.06193      | -1.28136     |
| H  | -2.68529     | 3.71335      | -0.04442     |
| H  | 0.80351      | 2.36444      | 0.47055      |
| H  | -1.42125     | 3.33973      | 1.25588      |

|   |          |          |          |
|---|----------|----------|----------|
| H | -1.33655 | 2.59236  | -1.72747 |
| C | -1.20682 | -2.61551 | 1.73069  |
| C | -0.74239 | -4.09000 | 1.79412  |
| O | -0.31749 | -4.39531 | 0.43587  |
| C | -0.22772 | -3.20656 | -0.20603 |
| H | -1.52164 | -4.80589 | 2.05827  |
| C | 0.29425  | -2.20919 | -2.50095 |
| C | 0.36284  | -3.26918 | -1.56020 |
| H | 0.12149  | -4.23697 | 2.45006  |
| C | -2.74792 | -2.40332 | 1.85137  |
| C | -3.17273 | -2.87562 | 3.25870  |
| H | -3.00452 | -3.94816 | 3.41325  |
| H | -2.62744 | -2.33090 | 4.03736  |
| H | -4.24233 | -2.69293 | 3.40951  |
| C | -3.52576 | -3.18920 | 0.77874  |
| H | -3.35776 | -4.27095 | 0.84561  |
| H | -4.60225 | -3.02217 | 0.89626  |
| H | -3.25182 | -2.86558 | -0.22990 |
| C | -3.06498 | -0.90042 | 1.72920  |
| H | -4.12963 | -0.72438 | 1.92611  |
| H | -2.46638 | -0.31344 | 2.43141  |
| H | -2.84239 | -0.53205 | 0.72465  |
| H | -0.72513 | -1.99392 | 2.49057  |
| C | 0.97011  | 2.19750  | -5.52817 |
| C | -0.37262 | 1.82352  | -5.50450 |
| C | -0.85072 | 0.97322  | -4.50442 |
| C | 0.01340  | 0.49348  | -3.50965 |
| C | 1.36479  | 0.88397  | -3.53689 |
| C | 1.83938  | 1.72199  | -4.54321 |
| H | 1.33905  | 2.85790  | -6.30798 |
| H | -1.05437 | 2.18935  | -6.26740 |
| H | -1.89608 | 0.68285  | -4.50433 |
| H | 2.04528  | 0.52423  | -2.76937 |
| H | 2.88669  | 2.01056  | -4.55321 |
| C | -5.02845 | -1.33012 | -3.19354 |
| C | -4.05592 | -2.20123 | -3.68737 |
| C | -2.71002 | -2.00461 | -3.37390 |
| C | -2.32093 | -0.93478 | -2.55225 |
| C | -3.30629 | -0.06920 | -2.05013 |
| C | -4.64932 | -0.26373 | -2.37586 |
| H | -6.07521 | -1.48504 | -3.43950 |
| H | -4.34253 | -3.03615 | -4.32123 |
| H | -1.96495 | -2.68667 | -3.77134 |
| H | -3.02081 | 0.75210  | -1.39887 |
| H | -5.40034 | 0.41455  | -1.98049 |
| C | 0.87955  | -2.40420 | -3.75968 |
| H | 0.83277  | -1.61297 | -4.49857 |
| C | 1.00997  | -4.46374 | -1.91106 |
| H | 1.05200  | -5.26295 | -1.18085 |
| C | 1.52669  | -3.59556 | -4.09165 |
| H | 1.97229  | -3.70738 | -5.07644 |
| C | 1.59423  | -4.62919 | -3.16354 |
| H | 2.09687  | -5.56033 | -3.40800 |

**Re-9**

|    | A            | B           | C            |
|----|--------------|-------------|--------------|
|    | -1275184.231 | -1274957.92 | -1275265.951 |
| Pd | -0.01139     | 0.06715     | -0.02488     |
| C  | -0.07679     | -0.05451    | 2.20284      |
| C  | 2.09228      | 0.13323     | -0.07999     |
| C  | 2.88206      | -1.09344    | 0.13805      |
| C  | 3.82939      | -1.27328    | 1.07488      |

|   |          |          |          |
|---|----------|----------|----------|
| C | -1.09407 | 0.96154  | 2.55567  |
| O | -2.30653 | 0.71329  | 2.60144  |
| N | -2.27435 | 0.67042  | -0.43300 |
| P | -0.39505 | -0.94824 | -2.22886 |
| C | -0.61790 | 2.38336  | 2.88687  |
| C | -0.61958 | -1.48533 | 2.30556  |
| C | 1.21296  | 0.08483  | 3.02664  |
| H | 2.20311  | 0.47863  | -1.11619 |
| H | 2.39102  | 0.93303  | 0.59960  |
| H | 2.69907  | -1.91333 | -0.55350 |
| H | 4.37680  | -2.20899 | 1.15623  |
| H | 4.10514  | -0.48746 | 1.77383  |
| H | 1.01605  | -0.36607 | 4.01669  |
| H | 2.00529  | -0.52750 | 2.58856  |
| H | 0.13364  | -2.21179 | 1.98284  |
| H | -0.88261 | -1.72430 | 3.34926  |
| H | -1.52842 | -1.63066 | 1.71691  |
| H | -0.32647 | 2.88074  | 1.95138  |
| H | -1.47478 | 2.92521  | 3.30006  |
| C | -2.94559 | 1.93374  | -0.02020 |
| C | -4.37031 | 1.44685  | 0.31038  |
| O | -4.46734 | 0.16883  | -0.37666 |
| C | -3.19634 | -0.19406 | -0.66578 |
| C | -3.06650 | -1.54259 | -1.26445 |
| C | -1.94633 | -1.97312 | -2.02326 |
| H | -5.17920 | 2.07576  | -0.06313 |
| H | -4.48530 | 1.26257  | 1.38109  |
| H | -2.47374 | 2.29558  | 0.89138  |
| C | -2.84149 | 3.05814  | -1.09678 |
| C | -1.35725 | 3.40755  | -1.31385 |
| H | -0.78758 | 2.53526  | -1.64238 |
| H | -1.25492 | 4.19131  | -2.07332 |
| H | -0.90009 | 3.77689  | -0.38873 |
| C | -3.47694 | 2.63669  | -2.43499 |
| H | -2.95323 | 1.78491  | -2.87733 |
| H | -4.53281 | 2.36556  | -2.32209 |
| H | -3.42748 | 3.46225  | -3.15346 |
| C | -3.56335 | 4.30883  | -0.55213 |
| H | -3.43246 | 5.14981  | -1.24168 |
| H | -4.64110 | 4.15199  | -0.43363 |
| H | -3.15879 | 4.61005  | 0.42109  |
| C | 2.69807  | -4.20071 | -3.49379 |
| C | 2.41888  | -3.14949 | -4.36481 |
| C | 1.47993  | -2.17417 | -4.01782 |
| C | 0.81532  | -2.23278 | -2.78538 |
| C | 1.11802  | -3.28863 | -1.90628 |
| C | 2.04132  | -4.26887 | -2.26235 |
| H | 3.42349  | -4.96143 | -3.76884 |
| H | 2.92541  | -3.08747 | -5.32436 |
| H | 1.26405  | -1.37283 | -4.71658 |
| H | 0.62334  | -3.34518 | -0.94028 |
| H | 2.25447  | -5.08202 | -1.57382 |
| C | -1.01761 | 1.47320  | -6.16409 |
| C | -1.81885 | 0.35555  | -5.92263 |
| C | -1.66469 | -0.38148 | -4.74727 |
| C | -0.71039 | -0.00340 | -3.78989 |
| C | 0.08193  | 1.12945  | -4.03643 |
| C | -0.06548 | 1.85730  | -5.21815 |
| H | -1.13748 | 2.04286  | -7.08125 |
| H | -2.56403 | 0.05130  | -6.65284 |
| H | -2.28836 | -1.25384 | -4.57853 |
| H | 0.81628  | 1.44298  | -3.29887 |

|   |          |          |          |
|---|----------|----------|----------|
| H | 0.55963  | 2.72819  | -5.39475 |
| C | -2.01416 | -3.23894 | -2.62449 |
| H | -1.18299 | -3.58743 | -3.22553 |
| C | -4.17084 | -2.39685 | -1.11189 |
| C | -4.19896 | -3.65902 | -1.69634 |
| H | -5.01420 | -2.05061 | -0.52678 |
| C | -3.11951 | -4.07582 | -2.46753 |
| H | -3.12698 | -5.05014 | -2.94879 |
| H | -5.06150 | -4.30363 | -1.55498 |
| C | 1.70487  | 1.51802  | 3.26802  |
| H | 2.56579  | 1.50001  | 3.94869  |
| H | 2.05511  | 1.96635  | 2.32934  |
| C | 0.58439  | 2.38898  | 3.84343  |
| H | 0.92757  | 3.41667  | 4.01628  |
| H | 0.27475  | 1.99222  | 4.82070  |

**Si-9**

|    | A            | B           | C            |
|----|--------------|-------------|--------------|
|    | -1275186.417 | -1274961.07 | -1275270.598 |
| Pd | -0.01139     | 0.06715     | -0.02488     |
| C  | -0.07679     | -0.05451    | 2.20284      |
| C  | 2.09228      | 0.13323     | -0.07999     |
| C  | 2.88206      | -1.09344    | 0.13805      |
| C  | 3.82939      | -1.27328    | 1.07488      |
| C  | -1.09407     | 0.96154     | 2.55567      |
| O  | -2.30653     | 0.71329     | 2.60144      |
| N  | -2.27435     | 0.67042     | -0.43300     |
| P  | -0.39505     | -0.94824    | -2.22886     |
| C  | -0.61790     | 2.38336     | 2.88687      |
| C  | -0.61958     | -1.48533    | 2.30556      |
| C  | 1.21296      | 0.08483     | 3.02664      |
| H  | 2.20311      | 0.47863     | -1.11619     |
| H  | 2.39102      | 0.93303     | 0.59960      |
| H  | 2.69907      | -1.91333    | -0.55350     |
| H  | 4.37680      | -2.20899    | 1.15623      |
| H  | 4.10514      | -0.48746    | 1.77383      |
| H  | 1.01605      | -0.36607    | 4.01669      |
| H  | 2.00529      | -0.52750    | 2.58856      |
| H  | 0.13364      | -2.21179    | 1.98284      |
| H  | -0.88261     | -1.72430    | 3.34926      |
| H  | -1.52842     | -1.63066    | 1.71691      |
| H  | -0.32647     | 2.88074     | 1.95138      |
| H  | -1.47478     | 2.92521     | 3.30006      |
| C  | -2.94559     | 1.93374     | -0.02020     |
| C  | -4.37031     | 1.44685     | 0.31038      |
| O  | -4.46734     | 0.16883     | -0.37666     |
| C  | -3.19634     | -0.19406    | -0.66578     |
| C  | -3.06650     | -1.54259    | -1.26445     |
| C  | -1.94633     | -1.97312    | -2.02326     |
| H  | -5.17920     | 2.07576     | -0.06313     |
| H  | -4.48530     | 1.26257     | 1.38109      |
| H  | -2.47374     | 2.29558     | 0.89138      |
| C  | -2.84149     | 3.05814     | -1.09678     |
| C  | -1.35725     | 3.40755     | -1.31385     |
| H  | -0.78758     | 2.53526     | -1.64238     |
| H  | -1.25492     | 4.19131     | -2.07332     |
| H  | -0.90009     | 3.77689     | -0.38873     |
| C  | -3.47694     | 2.63669     | -2.43499     |
| H  | -2.95323     | 1.78491     | -2.87733     |
| H  | -4.53281     | 2.36556     | -2.32209     |
| H  | -3.42748     | 3.46225     | -3.15346     |
| C  | -3.56335     | 4.30883     | -0.55213     |

|   |          |          |          |
|---|----------|----------|----------|
| H | -3.43246 | 5.14981  | -1.24168 |
| H | -4.64110 | 4.15199  | -0.43363 |
| H | -3.15879 | 4.61005  | 0.42109  |
| C | 2.69807  | -4.20071 | -3.49379 |
| C | 2.41888  | -3.14949 | -4.36481 |
| C | 1.47993  | -2.17417 | -4.01782 |
| C | 0.81532  | -2.23278 | -2.78538 |
| C | 1.11802  | -3.28863 | -1.90628 |
| C | 2.04132  | -4.26887 | -2.26235 |
| H | 3.42349  | -4.96143 | -3.76884 |
| H | 2.92541  | -3.08747 | -5.32436 |
| H | 1.26405  | -1.37283 | -4.71658 |
| H | 0.62334  | -3.34518 | -0.94028 |
| H | 2.25447  | -5.08202 | -1.57382 |
| C | -1.01761 | 1.47320  | -6.16409 |
| C | -1.81885 | 0.35555  | -5.92263 |
| C | -1.66469 | -0.38148 | -4.74727 |
| C | -0.71039 | -0.00340 | -3.78989 |
| C | 0.08193  | 1.12945  | -4.03643 |
| C | -0.06548 | 1.85730  | -5.21815 |
| H | -1.13748 | 2.04286  | -7.08125 |
| H | -2.56403 | 0.05130  | -6.65284 |
| H | -2.28836 | -1.25384 | -4.57853 |
| H | 0.81628  | 1.44298  | -3.29887 |
| H | 0.55963  | 2.72819  | -5.39475 |
| C | -2.01416 | -3.23894 | -2.62449 |
| H | -1.18299 | -3.58743 | -3.22553 |
| C | -4.17084 | -2.39685 | -1.11189 |
| C | -4.19896 | -3.65902 | -1.69634 |
| H | -5.01420 | -2.05061 | -0.52678 |
| C | -3.11951 | -4.07582 | -2.46753 |
| H | -3.12698 | -5.05014 | -2.94879 |
| H | -5.06150 | -4.30363 | -1.55498 |
| C | 1.70487  | 1.51802  | 3.26802  |
| H | 2.56579  | 1.50001  | 3.94869  |
| H | 2.05511  | 1.96635  | 2.32934  |
| C | 0.58439  | 2.38898  | 3.84343  |
| H | 0.92757  | 3.41667  | 4.01628  |
| H | 0.27475  | 1.99222  | 4.82070  |

#### Si-INT-5

|    | A            | B            | C            |
|----|--------------|--------------|--------------|
|    | -1275148.111 | -1274921.705 | -1275222.638 |
| Pd | 0.46367      | -0.34557     | -0.19517     |
| C  | 1.29512      | 0.80497      | 1.80093      |
| C  | 2.06948      | -1.18125     | 1.15757      |
| C  | 1.64226      | -2.08689     | 2.23574      |
| C  | 2.38520      | -2.46096     | 3.29141      |
| C  | -0.01098     | 0.62841      | 2.56332      |
| O  | -0.94545     | -0.02200     | 2.11528      |
| N  | -2.53152     | 0.80536      | -1.00818     |
| P  | -0.38362     | -0.97856     | -2.27186     |
| C  | -0.19987     | 1.39300      | 3.87644      |
| C  | 1.19487      | 2.04194      | 0.87286      |
| C  | 2.50329      | 1.00495      | 2.74052      |
| H  | 2.00675      | -1.68187     | 0.17427      |
| H  | 3.07188      | -0.77762     | 1.26842      |
| H  | 0.64088      | -2.50229     | 2.13029      |
| H  | 2.00854      | -3.16744     | 4.02566      |
| H  | 3.40379      | -2.10747     | 3.43427      |
| H  | 2.78285      | 0.05649      | 3.20712      |
| H  | 3.36187      | 1.33737      | 2.14443      |

|   |          |          |          |
|---|----------|----------|----------|
| H | 2.08772  | 2.11162  | 0.24436  |
| H | 0.31619  | 2.03846  | 0.21906  |
| H | 1.15110  | 2.96489  | 1.47443  |
| H | -0.52862 | 2.40394  | 3.58716  |
| H | -1.03674 | 0.93086  | 4.40902  |
| C | -3.00252 | 1.83442  | -0.06364 |
| C | -3.91920 | 1.04131  | 0.90864  |
| O | -4.07688 | -0.24857 | 0.27274  |
| C | -3.18394 | -0.26604 | -0.76018 |
| C | -3.12370 | -1.52682 | -1.52395 |
| C | -2.00609 | -1.90488 | -2.31472 |
| H | -4.91448 | 1.46989  | 1.05036  |
| H | -3.44351 | 0.87581  | 1.87846  |
| H | -2.13717 | 2.23093  | 0.48086  |
| C | -3.66391 | 3.03631  | -0.80762 |
| C | -2.61100 | 3.68338  | -1.72805 |
| H | -2.23842 | 2.96828  | -2.46477 |
| H | -3.04068 | 4.54029  | -2.26059 |
| H | -1.75389 | 4.04896  | -1.14895 |
| C | -4.86330 | 2.57376  | -1.65655 |
| H | -4.54702 | 1.85559  | -2.41871 |
| H | -5.64467 | 2.10288  | -1.04887 |
| H | -5.31839 | 3.42948  | -2.16827 |
| C | -4.12676 | 4.07551  | 0.23206  |
| H | -4.53670 | 4.95959  | -0.26896 |
| H | -4.90914 | 3.68471  | 0.89249  |
| H | -3.29151 | 4.40815  | 0.86028  |
| C | 2.56850  | -3.97615 | -4.30932 |
| C | 2.05032  | -2.92156 | -5.05908 |
| C | 1.14373  | -2.02578 | -4.48612 |
| C | 0.75153  | -2.16484 | -3.14686 |
| C | 1.28769  | -3.22831 | -2.40015 |
| C | 2.17890  | -4.13057 | -2.97635 |
| H | 3.27361  | -4.67135 | -4.75705 |
| H | 2.34884  | -2.79219 | -6.09636 |
| H | 0.74589  | -1.21505 | -5.08730 |
| H | 1.00185  | -3.34465 | -1.35757 |
| H | 2.57743  | -4.94876 | -2.38218 |
| C | -0.74999 | 2.35490  | -5.50225 |
| C | -1.66089 | 1.29756  | -5.51191 |
| C | -1.58141 | 0.29156  | -4.54694 |
| C | -0.59395 | 0.33584  | -3.55294 |
| C | 0.30973  | 1.40800  | -3.54545 |
| C | 0.23719  | 2.40699  | -4.51624 |
| H | -0.81227 | 3.13616  | -6.25522 |
| H | -2.43476 | 1.25253  | -6.27410 |
| H | -2.29290 | -0.52855 | -4.56794 |
| H | 1.06800  | 1.45500  | -2.76751 |
| H | 0.94722  | 3.22980  | -4.49823 |
| C | -2.11053 | -3.09135 | -3.05908 |
| H | -1.27637 | -3.40693 | -3.67515 |
| C | -4.26007 | -2.35049 | -1.47838 |
| C | -4.33481 | -3.52254 | -2.22431 |
| H | -5.09161 | -2.04733 | -0.85216 |
| C | -3.25609 | -3.88655 | -3.02677 |
| H | -3.29607 | -4.79237 | -3.62619 |
| C | 2.24012  | 1.99533  | 3.89172  |
| H | 3.14645  | 2.07606  | 4.50387  |
| H | 2.03336  | 3.00444  | 3.51058  |
| C | 1.06293  | 1.50845  | 4.74043  |
| H | 0.87457  | 2.18278  | 5.58412  |
| H | 1.30437  | 0.52607  | 5.16760  |

H -5.22737 -4.13993 -2.18101

**Re-INT-6**

|    | A            | B            | C            |
|----|--------------|--------------|--------------|
|    | -1275185.937 | -1274958.968 | -1275261.796 |
| Pd | 0.08183      | 0.03521      | 0.00932      |
| C  | 0.10557      | 0.09571      | 2.15852      |
| C  | 1.48044      | 0.01558      | 2.51926      |
| C  | 2.14057      | -1.15028     | 2.89924      |
| C  | 3.07702      | -2.24491     | 1.23232      |
| C  | 1.85283      | -2.55743     | 0.60382      |
| O  | 1.30015      | -1.75693     | -0.23019     |
| N  | 0.26666      | 0.14443      | -2.45252     |
| P  | -1.30127     | 1.82615      | -0.46366     |
| C  | 1.07632      | -3.80282     | 1.01077      |
| C  | 3.92466      | -1.14066     | 0.64306      |
| C  | 3.85538      | -3.33575     | 1.95538      |
| H  | -0.38756     | 1.04502      | 2.35655      |
| H  | -0.51028     | -0.76620     | 2.43264      |
| H  | 2.06975      | 0.92898      | 2.43804      |
| H  | 3.11901      | -1.06427     | 3.36345      |
| H  | 1.54512      | -1.98765     | 3.25036      |
| H  | 4.64598      | -0.75915     | 1.37604      |
| H  | 4.50275      | -1.50954     | -0.21687     |
| H  | 3.30319      | -0.31304     | 0.29616      |
| H  | 0.38702      | -3.53436     | 1.82863      |
| H  | 0.44303      | -4.09095     | 0.16466      |
| H  | 4.59549      | -3.75279     | 1.25153      |
| H  | 4.45093      | -2.89201     | 2.76617      |
| C  | 0.86469      | -1.01182     | -3.15804     |
| C  | 1.97407      | -0.35456     | -4.01296     |
| O  | 1.66497      | 1.06043      | -3.97102     |
| C  | 0.72822      | 1.21515      | -2.99248     |
| C  | 0.34989      | 2.61703      | -2.71304     |
| C  | -0.54974     | 3.01500      | -1.68585     |
| H  | 1.98837      | -0.65854     | -5.06146     |
| H  | 2.97265      | -0.49219     | -3.58494     |
| H  | 1.29260      | -1.67129     | -2.39945     |
| C  | -0.20415     | -1.82331     | -3.95371     |
| C  | 0.50056      | -3.02204     | -4.62157     |
| H  | 1.24574      | -2.71047     | -5.36286     |
| H  | 1.00758      | -3.64694     | -3.87717     |
| H  | -0.23028     | -3.65071     | -5.14205     |
| C  | -0.89886     | -0.95952     | -5.02330     |
| H  | -0.19373     | -0.56537     | -5.76451     |
| H  | -1.64268     | -1.55364     | -5.56586     |
| H  | -1.42029     | -0.11292     | -4.56625     |
| C  | -1.25881     | -2.35746     | -2.96555     |
| H  | -1.97521     | -3.00331     | -3.48671     |
| H  | -0.78790     | -2.93861     | -2.16595     |
| H  | -1.81228     | -1.53933     | -2.49912     |
| C  | -2.48044     | 4.56526      | 3.11424      |
| C  | -3.48786     | 3.99205      | 2.33937      |
| C  | -3.16520     | 3.19262      | 1.24007      |
| C  | -1.82533     | 2.95282      | 0.90313      |
| C  | -0.81743     | 3.52406      | 1.70142      |
| C  | -1.14204     | 4.33100      | 2.78992      |
| H  | -2.73466     | 5.18643      | 3.96875      |
| H  | -4.53159     | 4.16797      | 2.58649      |
| H  | -3.96139     | 2.75971      | 0.64333      |
| H  | 0.22696      | 3.33622      | 1.46405      |
| H  | -0.34973     | 4.76829      | 3.39143      |



|   |          |          |          |
|---|----------|----------|----------|
| C | -5.40020 | 0.55550  | -2.27924 |
| C | -4.80657 | 1.74274  | -2.71131 |
| C | -3.57142 | 2.14172  | -2.19628 |
| C | -2.90745 | 1.35129  | -1.24596 |
| C | -3.50616 | 0.15171  | -0.82877 |
| C | -4.74635 | -0.23884 | -1.33578 |
| H | -6.36246 | 0.24885  | -2.67982 |
| H | -5.30646 | 2.36420  | -3.44958 |
| H | -3.12616 | 3.07172  | -2.53668 |
| H | -2.98581 | -0.47755 | -0.11121 |
| H | -5.19589 | -1.16908 | -0.99949 |
| C | -0.83950 | 4.38396  | -1.56451 |
| H | -1.52136 | 4.71273  | -0.78846 |
| C | 0.91750  | 3.59634  | -3.54845 |
| H | 1.60579  | 3.27813  | -4.32183 |
| C | -0.27642 | 5.34025  | -2.40867 |
| H | -0.53486 | 6.38811  | -2.28089 |
| C | 0.61215  | 4.94561  | -3.40515 |
| C | 2.99025  | -4.47947 | 2.50474  |
| H | 2.44713  | -4.14076 | 3.39703  |
| H | 3.63374  | -5.30585 | 2.83108  |
| C | 1.98183  | -4.96043 | 1.45519  |
| H | 1.37851  | -5.78876 | 1.84691  |
| H | 2.52443  | -5.35293 | 0.58346  |
| H | 1.06484  | 5.67786  | -4.06713 |

**Si-INT-6**

|    | A            | B            | C            |
|----|--------------|--------------|--------------|
|    | -1275185.824 | -1274959.209 | -1275261.586 |
| Pd | 0.03155      | -0.04492     | -0.00455     |
| C  | 0.03852      | -0.08605     | 2.14545      |
| C  | 1.40666      | -0.02991     | 2.52764      |
| C  | 2.08370      | 1.13642      | 2.89626      |
| C  | 3.19810      | 2.12429      | 1.32446      |
| C  | 2.06174      | 2.29905      | 0.50027      |
| O  | 1.68507      | 1.38730      | -0.30995     |
| N  | 0.09250      | -0.16166     | -2.45114     |
| P  | -1.86893     | -1.26730     | -0.45925     |
| C  | 1.16090      | 3.52095      | 0.65126      |
| C  | 4.16440      | 1.01604      | 0.96659      |
| C  | 3.81648      | 3.33090      | 2.03006      |
| H  | -0.56877     | 0.78317      | 2.41353      |
| H  | -0.47660     | -1.02753     | 2.33344      |
| H  | 1.97488      | -0.95897     | 2.49336      |
| H  | 3.01847      | 1.03601      | 3.44052      |
| H  | 1.49198      | 2.00113      | 3.18688      |
| H  | 4.83230      | 1.33384      | 0.15319      |
| H  | 4.80024      | 0.75166      | 1.82019      |
| H  | 3.63077      | 0.12518      | 0.63119      |
| H  | 1.10191      | 3.99645      | -0.33821     |
| H  | 0.14563      | 3.16078      | 0.86572      |
| H  | 3.78482      | 3.18877      | 3.12158      |
| H  | 4.88472      | 3.37761      | 1.77611      |
| C  | 1.36291      | 0.17780      | -3.13098     |
| C  | 0.92814      | 1.26538      | -4.14368     |
| O  | -0.51865     | 1.18392      | -4.15789     |
| C  | -0.86601     | 0.39661      | -3.10093     |
| C  | -2.31908     | 0.28433      | -2.85613     |
| C  | -2.89212     | -0.43537     | -1.76932     |
| H  | 1.27693      | 1.10856      | -5.16632     |
| H  | 1.20429      | 2.27357      | -3.81840     |
| H  | 2.03481      | 0.59892      | -2.37870     |

|   |          |          |          |
|---|----------|----------|----------|
| C | 2.04879  | -1.07937 | -3.74964 |
| C | 3.36013  | -0.63205 | -4.42789 |
| H | 3.18592  | 0.03942  | -5.27657 |
| H | 4.01582  | -0.11421 | -3.71824 |
| H | 3.90526  | -1.50182 | -4.81088 |
| C | 1.13700  | -1.77671 | -4.77718 |
| H | 0.86200  | -1.11457 | -5.60685 |
| H | 1.64702  | -2.64505 | -5.20941 |
| H | 0.21564  | -2.13297 | -4.30673 |
| C | 2.39161  | -2.06834 | -2.61866 |
| H | 2.91830  | -2.94107 | -3.02309 |
| H | 3.03940  | -1.60050 | -1.86874 |
| H | 1.48947  | -2.41831 | -2.11244 |
| C | -4.83272 | -2.06407 | 3.04381  |
| C | -4.51801 | -3.10928 | 2.17549  |
| C | -3.65595 | -2.89494 | 1.09862  |
| C | -3.09226 | -1.62855 | 0.87905  |
| C | -3.40779 | -0.58607 | 1.76736  |
| C | -4.27823 | -0.79963 | 2.83462  |
| H | -5.50119 | -2.23499 | 3.88324  |
| H | -4.94384 | -4.09663 | 2.33421  |
| H | -3.42208 | -3.71722 | 0.43023  |
| H | -2.96076 | 0.39375  | 1.62103  |
| H | -4.51278 | 0.01765  | 3.51119  |
| C | -1.00609 | -5.54278 | -2.08427 |
| C | -2.00492 | -4.77855 | -2.68819 |
| C | -2.27806 | -3.48812 | -2.22917 |
| C | -1.54539 | -2.94226 | -1.16509 |
| C | -0.53322 | -3.71493 | -0.57320 |
| C | -0.27137 | -5.00843 | -1.02405 |
| H | -0.79718 | -6.54754 | -2.44147 |
| H | -2.57783 | -5.18731 | -3.51644 |
| H | -3.06583 | -2.90827 | -2.70048 |
| H | 0.05540  | -3.29151 | 0.23646  |
| H | 0.51364  | -5.59449 | -0.55396 |
| C | -4.29157 | -0.45877 | -1.66203 |
| H | -4.74921 | -0.99692 | -0.83951 |
| C | -3.16537 | 0.93394  | -3.77223 |
| H | -2.71523 | 1.48008  | -4.59240 |
| C | -5.11507 | 0.18671  | -2.58367 |
| H | -6.19432 | 0.13598  | -2.46670 |
| C | -4.54997 | 0.88799  | -3.64585 |
| C | 3.15078  | 4.67100  | 1.67549  |
| H | 3.46634  | 4.98208  | 0.66957  |
| H | 3.49007  | 5.45226  | 2.36678  |
| C | 1.62435  | 4.54289  | 1.70128  |
| H | 1.14617  | 5.51307  | 1.51906  |
| H | 1.30614  | 4.22859  | 2.70453  |
| H | -5.17811 | 1.39774  | -4.37027 |
